# Supplementary material for: Tracing the Origin of the RSPO2 Long-Hair Allele and Epistatic Interaction between FGF5 and RSPO2 in Sapsaree Dog
Source: Genes (Basel). 2022 Jan 1;13(1):102. doi: 10.3390/genes13010102 (PMC8775186; doi:10.3390/genes13010102)
Supplement: Supplementary file 1 [file genes-13-00102-s001.zip › Supplementary Tables.xlsx]

## Sheet: Table S1
Table S1. Details of the 795 dogs and their genome sequences used in the study.
Breed abbreviation with animal number	Breed	Accession number	Group1 (151 individuals)	Group2 (722 individuals)	RSPO2 genotype (reported)	RSPO2 genotype (predicted)
ACD1	Australian Cattle Dog	SAMEA104091560		O		11
ACD2	Australian Cattle Dog	SAMN03323677		O		11
ACD3	Australian Cattle Dog	SAMEA3928139		O		11
ACD4	Australian Cattle Dog	SAMEA4504820		O		11
ACS1	American Cocker Spaniel	SAMN03801660		O	11	11
ACS2	American Cocker Spaniel	SRR5664960		O	11
ACS3	American Cocker Spaniel	SRR5664961		O	11	11
ACS4	American Cocker Spaniel	SRR5664958		O	11	11
ACS5	American Cocker Spaniel	SRR5664959		O	11	11
ACS6	American Cocker Spaniel	SRR5664964		O	11	11
AFH1	Afghan Hound	SRR1061643	O		11
AFH2	Afghan Hound	SAMN02194722	O	O	11	11
AFH3	Afghan Hound	SRR2827562	O		11
AFH4	Afghan Hound	SAMN02485564		O	11
AFH5	Afghan Hound	SAMN03168377		O	11
AHT1	American Hairless Terrier	SAMN08872813		O		11
AIT1	Airedale Terrier	SAMN03580381		O	22
AIT2	Airedale Terrier	SAMN03580390		O	22	22
AIT3	Airedale Terrier	SAMN04196850		O	22	22
AIT4	Airedale Terrier	SAMEA4506896		O	22	22
ALD1	Alpine Dachsbracke	SAMEA4346711		O		11
ALH1	Alaskan Husky	SAMEA3449656		O
ALH2	Alaskan Husky	SAMEA3449657		O
ALM1	Alaskan Malamute	SAMEA104091571		O	11
ALM2	Alaskan Malamute	SAMN08872810		O	11	11
ALM3	Alaskan Malamute	SAMN03168378		O	11
ANF1	Andean Fox	SAMN02487034		O
AUT1	Australian Terrier	SAMEA4504840		O	22	22
BAH1	Bavarian Hound	SAMEA104091562		O		11
BAS1	Basenji	SAMN06159689		O	11	11
BAS2	Basenji	SAMN03366708		O	11
BAS3	Basenji	SAMN04196845		O	11
BAS4	Basenji	SAMN03580393		O	11	11
BBS1	Berger Blanc Suisse	SAMEA4506887		O
BDF1	Bouvier des Flandres	SAMN08872908	O	O	22	22
BDF2	Bouvier des Flandres	SAMN06159671	O	O	22	22
BDF3	Bouvier des Flandres	SAMN08872909	O	O	22	22
BEA1	Beagle	SAMN06159681		O		11
BEA2	Beagle	SAMN03801644		O		11
BEA3	Beagle	SAMN01737209		O		11
BEA4	Beagle	SAMEA2376414		O
BEA5	Beagle	SAMN03801645		O
BEC1	Bearded Collie	SAMEA3928140	O	O	22	22
BEC2	Bearded Collie	SAMEA4505492	O	O	22	22
BEC3	Bearded Collie	SAMEA4504824	O	O	22
BEC4	Bearded Collie	SAMEA4505493	O	O	22
BEC5	Bearded Collie	SAMEA4504827	O	O	22
BEC6	Bearded Collie	SAMEA4505496	O	O	22
BEC7	Bearded Collie	SAMEA4504832	O	O	22
BEM1	Belgian Malinois	SAMN01974495		O
BEM2	Belgian Malinois	SAMEA4504823		O
BEM3	Belgian Malinois	SAMEA4504826		O
BEM4	Belgian Malinois	SAMEA104032048		O		11
BEM5	Belgian Malinois	SAMEA104125121		O		11
BEP1	Berger Picard	SAMN06159678		O		22
BEP2	Berger Picard	SAMN03580405		O		22
BEP3	Berger Picard	SAMN04196849		O		22
BEP4	Berger Picard	SAMN04196860		O		22
BES1	Belgian Sheepdog	SAMN03801646		O		11
BES2	Belgian Sheepdog	SAMN08872843		O
BES3	Belgian Sheepdog	SAMN08872844		O		11
BES4	Belgian Sheepdog	SAMN08872845		O
BES5	Belgian Sheepdog	SAMN08872846		O
BES6	Belgian Sheepdog	SAMN08872847		O		11
BES7	Belgian Sheepdog	SAMN08872848		O
BET1	Belgian Tervuren	SAMN08872849		O		11
BET10	Belgian Tervuren	SAMN08872858		O		11
BET11	Belgian Tervuren	SAMN08872859		O
BET2	Belgian Tervuren	SAMN08872850		O
BET3	Belgian Tervuren	SAMN08872851		O
BET4	Belgian Tervuren	SAMN08872852		O		11
BET5	Belgian Tervuren	SAMN08872853		O
BET6	Belgian Tervuren	SAMN08872854		O
BET7	Belgian Tervuren	SAMN08872855		O
BET8	Belgian Tervuren	SAMN08872856		O
BET9	Belgian Tervuren	SAMN08872857		O
BIT1	Brittany	SAMN03801653		O	11
BLM1	Bullmastiff	SAMEA103949042		O	11
BLO1	Bloodhound	SAMN03801649		O	11	11
BMD1	Bernese Mountain Dog	SAMN03801648		O	11	11
BMD10	Bernese Mountain Dog	SAMN08872874		O	11
BMD11	Bernese Mountain Dog	SAMN08872875		O	11
BMD12	Bernese Mountain Dog	SAMN08872876		O	11
BMD13	Bernese Mountain Dog	SAMN08872877		O	11
BMD14	Bernese Mountain Dog	SAMN08872878		O	11
BMD15	Bernese Mountain Dog	SAMN08872879		O	11
BMD16	Bernese Mountain Dog	SAMN08872880		O	11
BMD17	Bernese Mountain Dog	SAMN08872881		O	11
BMD18	Bernese Mountain Dog	SAMN08872882		O	11
BMD2	Bernese Mountain Dog	SAMN08872866		O	11	11
BMD3	Bernese Mountain Dog	SAMN08872867		O	11
BMD4	Bernese Mountain Dog	SAMN08872868		O	11
BMD5	Bernese Mountain Dog	SAMN08872869		O	11
BMD6	Bernese Mountain Dog	SAMN08872870		O	11
BMD7	Bernese Mountain Dog	SAMN08872871		O	11
BMD8	Bernese Mountain Dog	SAMN08872872		O	11
BMD9	Bernese Mountain Dog	SAMN08872873		O	11
BOC1	Border Collie	SAMEA4505490		O	11
BOC10	Border Collie	SAMEA104125115		O	11	11
BOC11	Border Collie	SAMN01908107		O	11
BOC12	Border Collie	SAMN03801650		O	11
BOC13	Border Collie	SAMN03801651		O	11	11
BOC14	Border Collie	SAMEA4504821		O	11	11
BOC15	Border Collie	SAMEA3724571		O	11	11
BOC2	Border Collie	SAMEA104091558		O	11	11
BOC3	Border Collie	SAMN04908310		O	11	11
BOC4	Border Collie	SAMN04908311		O	11	11
BOC5	Border Collie	SAMN04908307		O	11	11
BOC6	Border Collie	SAMN04908308		O	11	11
BOC7	Border Collie	SAMEA104125112		O	11	11
BOC8	Border Collie	SAMEA104125113		O	11	11
BOC9	Border Collie	SAMN04908309		O	11	11
BOR1	Borzoi	SAMN08872905		O	11	11
BOT1	Border Terrier	SAMN06159673		O	22	22
BOT2	Border Terrier	SAMN03580407		O	22	22
BOT3	Border Terrier	SAMN04196855		O	22	22
BOT4	Border Terrier	SAMN04196856		O	22	22
BOX1	Boxer	SAMN02921305		O	11	11
BRI1	Briard	SRR12330060	O		22
BRI2	Briard	SRR12330061	O		22
BRI3	Briard	SRR12330063	O		22
BRI4	Briard	SRR14750537	O		22
BRI5	Briard	SRR14750538	O		22
BRT1	Black Russian Terrier	SAMN03323668		O	22	22
BST1	Boston Terrier	SAMN08872906		O	11	11
BTC1	Black and Tan Coonhound	SAMN04196853		O		11
BTM1	Bull Terrier Miniature	SAMEA4506897		O		11
BUL1	Bulldog	SAMN03801654		O		11
BUT1	Bull Terrier	SAMEA104125116		O		11
BUT2	Bull Terrier	SAMN08872913		O		11
BUT3	Bull Terrier	SAMN08872914		O		11
BUT4	Bull Terrier	SAMN08872915		O		11
BUT5	Bull Terrier	SAMN08872916		O		11
BUT6	Bull Terrier	SAMN08872917		O		11
BUT7	Bull Terrier	SAMN08872918		O		11
BUT8	Bull Terrier	SAMN08872919		O
BUT9	Bull Terrier	SAMN08872920		O
CAC1	Cane Corso	SAMN04196864		O		11
CAD1	Carolina Dog	SAMN08872926		O		11
CAO1	Caucasian Ovcharka	SAMN02485585		O
CAT1	Cairn Terrier	SAMEA104091555		O	22	22
CBR1	Chesapeake Bay Retriever	SAMN06159679		O	11	11
CCR1	Curly Coated Retreiver	SAMEA104091556		O		11
CHC1	Chinese Crested	SAMN03075611		O	12 or 22	22
CHC2	Chinese Crested	SAMN02921308		O	12 or 22	22
CHD1	Chongqing Dog	SAMN02485578		O
CHI1	Chihuahua	SAMN03801656		O	11	11
CHI2	Chihuahua	SAMN03168379		O	11
CHI3	Chihuahua	SAMEA3905753		O	11	11
CHN1	Chinook	SAMN03580382		O
CID1	Chinese Indigenous Dog	SAMN03168352		O
CID10	Chinese Indigenous Dog	SAMN03168360		O
CID11	Chinese Indigenous Dog	SAMN03168361		O
CID12	Chinese Indigenous Dog	SAMN03168365		O
CID13	Chinese Indigenous Dog	SAMN03168366		O
CID14	Chinese Indigenous Dog	SAMN03168367		O
CID15	Chinese Indigenous Dog	SAMN03168357		O
CID2	Chinese Indigenous Dog	SAMN03168353		O
CID3	Chinese Indigenous Dog	SAMN03168354		O
CID4	Chinese Indigenous Dog	SAMN03168355		O
CID5	Chinese Indigenous Dog	SAMN03168363		O
CID6	Chinese Indigenous Dog	SAMN03168364		O
CID7	Chinese Indigenous Dog	SAMN03168356		O
CID8	Chinese Indigenous Dog	SAMN03168358		O
CID9	Chinese Indigenous Dog	SAMN03168359		O
CKC1	Cavalier King Charles Spaniel	SAMEA104091570		O		11
CKC2	Cavalier King Charles Spaniel	SAMEA104091569		O		11
CLS1	Clumber Spaniel	SAMN03801659		O
COC1	Chow Chow	SAMN03801657		O
COC2	Chow Chow	SAMN03801658		O		11
COC3	Chow Chow	SAMN02485574		O
COC4	Chow Chow	SAMEA104091566		O
COY1	Coyote	SAMN02921301		O		11
COY2	Coyote	SAMN02921302		O
COY3	Coyote	SAMN02921303		O
CSP1	Chinese Shar Pei	SAMN05356426		O	11
CSP2	Chinese Shar Pei	SAMN05356427		O	11
DAC1	Dachshund	SAMN06159670		O	11 or 12 or 22	11
DAC2	Dachshund	SAMN06159676		O	11 or 12 or 22	11
DAC3	Dachshund	SAMEA3121338		O	11 or 12 or 22
DAC4	Dachshund	SAMEA104091567		O	11 or 12 or 22	12
DAC5	Dachshund	SAMEA104125117		O	11 or 12 or 22
DAL1	Dalmatian	SAMN06214558		O
DAL2	Dalmatian	SAMN08872976		O		11
DHO1	Dhole	SAMN03168405		O
DIN1	Dingo	SAMN03366709		O
DON1	DongGyeongi	SRR5177169	O
DON10	DongGyeongi	SRR5177178	O
DON11	DongGyeongi	SRR5177179	O
DON12	DongGyeongi	SRR5177180	O
DON13	DongGyeongi	SRR5177181	O
DON14	DongGyeongi	SRR5177182	O			11
DON15	DongGyeongi	SRR5177183	O
DON16	DongGyeongi	SRR5177184	O			11
DON17	DongGyeongi	SRR5177185	O
DON18	DongGyeongi	SRR5177186	O			11
DON19	DongGyeongi	SRR5177187	O
DON2	DongGyeongi	SRR5177170	O
DON20	DongGyeongi	SRR5177188	O
DON21	DongGyeongi	SRR5177189	O
DON22	DongGyeongi	SRR5177190	O
DON3	DongGyeongi	SRR5177171	O
DON4	DongGyeongi	SRR5177172	O
DON5	DongGyeongi	SRR5177173	O
DON6	DongGyeongi	SRR5177174	O
DON7	DongGyeongi	SRR5177175	O
DON8	DongGyeongi	SRR5177176	O
DON9	DongGyeongi	SRR5177177	O			11
DOP1	Doberman Pinscher	SAMEA4505489		O	11	11
DOP2	Doberman Pinscher	SAMN03801662		O	11	11
DOP3	Doberman Pinscher	SAMN03580409		O	11	11
DOP4	Doberman Pinscher	SAMEA4509491		O	11
DOP5	Doberman Pinscher	SAMEA4509492		O	11
ECS1	English Cocker Spaniel	SAMEA4506900		O	11	11
ECS2	English Cocker Spaniel	SAMEA1521941		O	11	11
ECS3	English Cocker Spaniel	SAMN03323672		O	11
ECS4	English Cocker Spaniel	SAMN03323673		O	11
ECS5	English Cocker Spaniel	SAMN02921306		O	11
ECS6	English Cocker Spaniel	SRR5664965		O	11	11
ELO1	Elo	SAMEA4506890		O		11
ENM1	English Mastiff	SAMN03801664		O		11
ENM2	English Mastiff	SAMN03580412		O
ENP1	English Pointer	SAMN03801665		O		11
ENP2	English Pointer	SAMN03580383		O
ENS1	English Setter	SAMN06159667		O		11
ENS2	English Setter	SAMN06159682		O		11
ENS3	English Setter	SAMN04196858		O		11
ESL1	East Siberian Laika	SAMN03168390		O
ESS1	English Springer Spaniel	SAMN03580391		O	11	11
ESS2	English Springer Spaniel	SAMN04196857		O	11	11
ETS1	Entlebucher Sennenhund	SAMEA4504828		O	11
ETS2	Entlebucher Sennenhund	SAMEA4505497		O	11
ETS3	Entlebucher Sennenhund	SAMEA4504829		O	11
ETS4	Entlebucher Sennenhund	SAMEA4505498		O	11
ETS5	Entlebucher Sennenhund	SAMEA4504830		O	11
ETS6	Entlebucher Sennenhund	SAMEA4505499		O	11
ETS7	Entlebucher Sennenhund	SAMEA4505500		O	11
ETS8	Entlebucher Sennenhund	SAMEA4505501		O	11
EUR1	Eurasier	SAMEA2446720		O
EUR2	Eurasier	SAMEA4506889		O
FIL1	Finnish Lapphund	SAMN03168391		O
FIS1	Field Spaniel	SAMN06159668		O		11
FLR1	Flatcoated Retriever	SAMN03801666		O	11	11
FLR2	Flatcoated Retriever	SAMN03801667		O	11	11
FLR3	Flatcoated Retriever	SAMN08873011		O	11	11
FOD1	Fonni Dog	SAMN08873012		O		22
FRB1	French Bulldog	SAMEA4504835		O
FRB2	French Bulldog	SAMEA3928146		O		11
GED1	Greenland Dog	SAMN03168381		O
GHT1	German Hunting Terrier	SAMEA104125120		O		12
GOJ1	Golden Jackal	SAMN03366713		O	11
GOR1	Golden Retriever	SAMN08873033		O	11	11
GOR10	Golden Retriever	SAMN03067893		O	11	11
GOR11	Golden Retriever	SAMN03067878		O	11	11
GOR12	Golden Retriever	SAMN03275923		O	11	11
GOR13	Golden Retriever	SAMN03275922		O	11	11
GOR14	Golden Retriever	SAMN03275921		O	11	11
GOR15	Golden Retriever	SAMN03275924		O	11	11
GOR16	Golden Retriever	SAMN03323669		O	11	11
GOR17	Golden Retriever	SAMN03067876		O	11	11
GOR18	Golden Retriever	SAMN03580402		O	11	11
GOR19	Golden Retriever	SAMN04196854		O	11	11
GOR2	Golden Retriever	SAMN08873034		O	11	11
GOR20	Golden Retriever	SAMEA104016307		O	11	11
GOR3	Golden Retriever	SAMN08873035		O	11	11
GOR4	Golden Retriever	SAMN08873036		O	11	11
GOR5	Golden Retriever	SAMN08873037		O	11	11
GOR6	Golden Retriever	SAMN08873038		O	11	11
GOR7	Golden Retriever	SAMN03801668		O	11	11
GOR8	Golden Retriever	SAMN03067891		O	11	11
GOR9	Golden Retriever	SAMN03067895		O	11	11
GOS1	Gordon Setter	SAMN06159680		O	11	11
GOS2	Gordon Setter	SAMN04196859		O	11	11
GRD1	Great Dane	SAMEA104091557		O	11	11
GRD2	Great Dane	SAMN06159672		O	11	11
GRD3	Great Dane	SAMN06159683		O	11	11
GRD4	Great Dane	SAMN03801669		O	11	11
GRD5	Great Dane	SAMN04851098		O	11	11
GRE1	Greyhound	SAMN03801671		O	11
GRE2	Greyhound	SAMN03067872		O	11	11
GRE3	Greyhound	SAMN03067873		O	11	11
GRE4	Greyhound	SAMN03067882		O	11	11
GRE5	Greyhound	SAMN03068229		O	11	11
GRE6	Greyhound	SAMN03067874		O	11	11
GRE7	Greyhound	SAMN03067890		O	11	11
GRE8	Greyhound	SAMN03068228		O	11	11
GRE9	Greyhound	SAMEA104125118		O	11	11
GRO1	Grossspitz	SAMEA104105252		O		11
GRP1	Great Pyrenees	SAMN03801670		O	11
GRW1	Grey Wolf	SAMN01974486		O	11
GRW10	Grey Wolf	SAMN02921311		O	11	11
GRW11	Grey Wolf	SAMN02921312		O	11	11
GRW12	Grey Wolf	SAMN02921313		O	11
GRW13	Grey Wolf	SAMN02921314		O	11	11
GRW14	Grey Wolf	SAMN02921315		O	11
GRW15	Grey Wolf	SAMN02921316		O	11	11
GRW16	Grey Wolf	SAMN02921319		O	11	11
GRW17	Grey Wolf	SAMN02921320		O	11	11
GRW18	Grey Wolf	SAMN02921321		O	11	11
GRW19	Grey Wolf	SAMN02921322		O	11
GRW2	Grey Wolf	SAMN01974487		O	11
GRW20	Grey Wolf	SAMN03168394		O	11
GRW21	Grey Wolf	SAMN03168397		O	11
GRW22	Grey Wolf	SAMN03168399		O	11
GRW23	Grey Wolf	SAMN03168396		O	11
GRW24	Grey Wolf	SAMN03168398		O	11	11
GRW25	Grey Wolf	SAMN03168400		O	11
GRW26	Grey Wolf	SAMN03168393		O	11
GRW27	Grey Wolf	SAMN03168395		O	11
GRW28	Grey Wolf	ERR1990142	O		11	11
GRW29	Grey Wolf	ERR1990157	O		11
GRW3	Grey Wolf	SAMN01974488		O	11
GRW30	Grey Wolf	ERR1990165	O		11	11
GRW31	Grey Wolf	ERR1990170	O		11	11
GRW32	Grey Wolf	ERR1990184	O		11	11
GRW33	Grey Wolf	ERR1990224	O		11	11
GRW34	Grey Wolf	SAMN05439956		O	11
GRW35	Grey Wolf	SAMN05791669		O	11
GRW36	Grey Wolf	SAMN05791668		O	11
GRW37	Grey Wolf	SAMN05736724		O	11
GRW38	Grey Wolf	SAMEA104091563		O	11	11
GRW39	Grey Wolf	SAMEA104091564		O	11	11
GRW4	Grey Wolf	SAMN01974489		O	11
GRW40	Grey Wolf	SAMEA104091565		O	11	11
GRW41	Grey Wolf	SAMN04209256		O	11
GRW42	Grey Wolf	SAMN06219538		O	11	11
GRW43	Grey Wolf	SAMN06219539		O	11	11
GRW5	Grey Wolf	SAMN03366711		O	11	11
GRW6	Grey Wolf	SAMN03366712		O	11
GRW7	Grey Wolf	SAMN03366710		O	11
GRW8	Grey Wolf	SAMN03801694		O	11	11
GRW9	Grey Wolf	SAMN02921310		O	11	11
GSD1	German Shepherd Dog	SAMEA4506895		O	11	11
GSD10	German Shepherd Dog	SAMN02585206		O	11
GSD11	German Shepherd Dog	SAMN02585207		O	11
GSD12	German Shepherd Dog	SAMN02585208		O	11
GSD13	German Shepherd Dog	SAMN02585209		O	11
GSD14	German Shepherd Dog	SAMN02585210		O	11
GSD15	German Shepherd Dog	SAMN03580392		O	11	11
GSD16	German Shepherd Dog	SRR7107629	O		11
GSD17	German Shepherd Dog	SRR7107884	O		11
GSD18	German Shepherd Dog	SRR7107640	O		11
GSD19	German Shepherd Dog	SRR7107641	O		11
GSD2	German Shepherd Dog	SAMEA72802168		O	11	11
GSD20	German Shepherd Dog	SRR7107768	O		11
GSD3	German Shepherd Dog	SAMEA72802918		O	11	11
GSD4	German Shepherd Dog	SAMN01974494		O	11
GSD5	German Shepherd Dog	SAMN02585201		O	11
GSD6	German Shepherd Dog	SAMN02585202		O	11
GSD7	German Shepherd Dog	SAMN02585203		O	11
GSD8	German Shepherd Dog	SAMN02585204		O	11
GSD9	German Shepherd Dog	SAMN02585205		O	11
GSW1	Greater Swiss Mountain Dog	SAMN06159674		O	11	11
GSW2	Greater Swiss Mountain Dog	SAMN08873062		O	11	11
GWP1	German Wirehaired Pointer	SAMEA3928144		O	12 or 22	12
HEI1	Heideterrier	SAMEA103135918		O		12
HIW1	Grey Wolf (Canis Lupus chanco)	SAMN03652997		O		11
HIW10	Grey Wolf (Canis Lupus chanco)	SRR7107909	O			11
HIW11	Grey Wolf (Canis Lupus chanco)	SRR7107912	O			11
HIW2	Grey Wolf (Canis Lupus chanco)	SAMN03653003		O		11
HIW3	Grey Wolf (Canis Lupus chanco)	SAMN03652998		O		11
HIW4	Grey Wolf (Canis Lupus chanco)	SAMN03653001		O		11
HIW5	Grey Wolf (Canis Lupus chanco)	SAMN03653004		O		11
HIW6	Grey Wolf (Canis Lupus chanco)	SAMN03652999		O		11
HIW7	Grey Wolf (Canis Lupus chanco)	SAMN03653000		O		11
HIW8	Grey Wolf (Canis Lupus chanco)	SAMN03653002		O		11
HIW9	Grey Wolf (Canis Lupus chanco)	SRR7107907	O
HOV1	Hovawart	SAMEA4506894		O
IBW1	Iberian Wolf (Canis lupus signatus)	SAMN04851099		O		11
IRS1	Irish Setter	SAMN08873112		O		11
IRT1	Irish Terrier	SAMN06159684		O	22	22
IRT2	Irish Terrier	SAMEA3928141		O	22	22
IRW1	Irish Wolfhound	SAMN03801672		O	22	22
ISH1	Istrian Shorthaired Hound	SAMN02485584		O
ITG1	Italian Greyhound	SAMN03801673		O	11	11
ITG2	Italian Greyhound	SAMN03801674		O	11	11
IWS1	Irish Water Spaniel	SAMN08873115		O	11	11
IWS2	Irish Water Spaniel	SAMN08873116		O	11	11
IWS3	Irish Water Spaniel	SAMN08873117		O	11	11
JAM1	Jamthund	SAMN03168383		O		11
JIN1	Jindo	KKU	O			11
JIN2	Jindo	KKU	O			11
JIN3	Jindo	KKU	O			11
JIN4	Jindo	KKU	O			11
JIN5	Jindo	KKU	O			11
JIN6	Jindo	SAMD00009664		O		11
JRT1	Jack Russell Terrier	SAMN03580384		O		11
JRT2	Jack Russell Terrier	SAMN03580400		O		11
JRT3	Jack Russell Terrier	SAMN03580404		O		12
JRT4	Jack Russell Terrier	SAMN04196852		O		12
KBT1	Kerry Blue Terrier	SAMN03580387		O		22
KEE1	Keeshond	SAMN08873128		O		11
KOM1	Komondor	SAMN08873130		O		22
KRO1	Kromfohrlander	SAMEA2446055		O
KUN1	Kunming Dog	SAMN02585191		O
KUN2	Kunming Dog	SAMN02585192		O
KUN3	Kunming Dog	SAMN02585193		O
KUN4	Kunming Dog	SAMN02585194		O
KUN5	Kunming Dog	SAMN02585195		O
KUN6	Kunming Dog	SAMN02585196		O
KUN7	Kunming Dog	SAMN02585197		O
LAH1	Lapponian Herder	SAMN03168384		O
LAN1	Landseer	SAMEA3121328		O		11
LAR1	Labrador Retriever	SAMN08873139		O	11	11
LAR10	Labrador Retriever	SAMN08873148		O	11	11
LAR11	Labrador Retriever	SAMEA104091568		O	11
LAR12	Labrador Retriever	SAMEA2417015		O	11	11
LAR13	Labrador Retriever	SAMEA2417016		O	11	11
LAR14	Labrador Retriever	SAMN02485565		O	11
LAR15	Labrador Retriever	SAMN03801675		O	11	11
LAR16	Labrador Retriever	SAMN04196848		O	11
LAR17	Labrador Retriever	SAMN08873155		O	11	11
LAR18	Labrador Retriever	SAMN03580399		O	11	11
LAR19	Labrador Retriever	SAMEA4504834		O	11
LAR2	Labrador Retriever	SAMN06159685		O	11	11
LAR20	Labrador Retriever	SAMN04196862		O	11	11
LAR21	Labrador Retriever	SAMN04196865		O	11	11
LAR22	Labrador Retriever	SAMN08873160		O	11
LAR23	Labrador Retriever	SAMN08873161		O	11
LAR24	Labrador Retriever	SAMN08873162		O	11
LAR3	Labrador Retriever	SAMN08873141		O	11	11
LAR4	Labrador Retriever	SAMN08873142		O	11	11
LAR5	Labrador Retriever	SAMN08873143		O	11	11
LAR6	Labrador Retriever	SAMN08873144		O	11	11
LAR7	Labrador Retriever	SAMN08873145		O	11	11
LAR8	Labrador Retriever	SAMN08873146		O	11	11
LAR9	Labrador Retriever	SAMN08873147		O	11	11
LEO1	Leonberger	SAMEA103935360		O
LGR1	Lagotto Romagnolo	SAMEA3928142		O
LGR2	Lagotto Romagnolo	SAMEA4505491		O		22
LGR3	Lagotto Romagnolo	SAMEA4505494		O
LGR4	Lagotto Romagnolo	SAMEA4504833		O
LGR5	Lagotto Romagnolo	SAMEA4509490		O
LHA1	Lhasa Apso	SRR12330271	O		22
LHA2	Lhasa Apso	SRR12330272	O		22
LHA3	Lhasa Apso	SRR12330273	O		22
LOW1	Lowchen	SAMN04196863		O		22
MIP1	Miniature Poodle	SAMN08873174		O	22
MIP2	Miniature Poodle	SAMN08873175		O	22	22
MIS1	Miniature Schnauzer	SAMN08873176		O	22
MIS2	Miniature Schnauzer	SAMN08873177		O	22
MIS3	Miniature Schnauzer	SAMN04196847		O	22
NGS1	New Guinea Singing Dog	SAMN08873190		O		11
NGS2	New Guinea Singing Dog	SAMN06608432		O
NGS3	New Guinea Singing Dog	SAMN06608434		O
NGS4	New Guinea Singing Dog	SAMN06608444		O
NGS5	New Guinea Singing Dog	SAMN03168373		O
NGS6	New Guinea Singing Dog	SAMN03168374		O
NGS7	New Guinea Singing Dog	SAMN03168375		O
NGS8	New Guinea Singing Dog	SAMN03168376		O
NOE1	Norwegian Elkhound	SAMN03168382		O		11
NOE2	Norwegian Elkhound	SAMN08873199		O		11
NOL1	Norwegian Lundehund	SAMN01893932		O		11
NOL2	Norwegian Lundehund	SAMN04440505		O
NOL3	Norwegian Lundehund	SAMN04440506		O
NOT1	Norwich Terrier	SAMEA104091553		O
NOT2	Norwich Terrier	SAMEA104091550		O
NOT3	Norwich Terrier	SAMEA104091551		O
NOT4	Norwich Terrier	SAMEA104091552		O
NSD1	Nova Scotia Duck Tolling Retriever	SAMN03323675		O		11
OES1	Old English Sheepdog	SRR12330237	O		22
OES2	Old English Sheepdog	SRR12330235	O		22
OES3	Old English Sheepdog	SRR12330234	O		22
PBG1	Petit Basset Griffon Vendeen	SAMEA3723573		O	22	22
PEK1	Pekingese	KKU	O		11	11
PEK2	Pekingese	KKU	O		11	11
PEK3	Pekingese	KKU	O		11	11
PEK4	Pekingese	KKU	O		11	11
PEK5	Pekingese	KKU	O		11	11
PEK6	Pekingese	SRR2095500	O		11	11
PEK7	Pekingese	SAMN04852961	O		11
PEK8	Pekingese	SAMN03801676		O	11	11
PIO1	Peruvian Inca Orchid	SAMN03168386		O
POM1	Pomeranian	SAMEA4506892		O	11	11
POP1	Portuguese Podengo	SAMN03580388		O		22
PUG1	Pug	KKU	O		11	11
PUG10	Pug	ERR2196267	O		11	11
PUG11	Pug	ERR2196268	O		11	11
PUG12	Pug	ERR2196269	O		11	11
PUG13	Pug	ERR2196270	O		11	11
PUG14	Pug	ERR2196271	O		11	11
PUG15	Pug	ERR2196272	O		11	11
PUG16	Pug	ERR2196273	O		11	11
PUG17	Pug	ERR2196274	O		11	11
PUG18	Pug	ERR2196275	O		11	11
PUG19	Pug	ERR2196276	O		11	11
PUG2	Pug	KKU	O		11	11
PUG20	Pug	ERR2196277	O		11	11
PUG21	Pug	ERR2196278	O		11	11
PUG22	Pug	ERR2196279	O		11	11
PUG23	Pug	SRR2094402	O		11
PUG24	Pug	SRR2094403	O		11
PUG25	Pug	SRR2094404	O		11
PUG26	Pug	SRR2094405	O		11
PUG27	Pug	SRR2094406	O		11
PUG28	Pug	SAMN03801678		O	11
PUG29	Pug	SAMN03801679		O	11
PUG3	Pug	KKU	O		11	11
PUG30	Pug	SAMN03801680		O	11
PUG31	Pug	SAMN03801681		O	11
PUG32	Pug	SAMN03801682		O	11
PUG4	Pug	KKU	O		11	11
PUG5	Pug	KKU	O		11	11
PUG6	Pug	ERR2196095	O		11	11
PUG7	Pug	ERR2196264	O		11	11
PUG8	Pug	ERR2196265	O		11	11
PUG9	Pug	ERR2196266	O		11	11
PWC1	Pembroke Welsh Corgi	SAMN03145702		O
PWC2	Pembroke Welsh Corgi	SAMN03145703		O		11
PWC3	Pembroke Welsh Corgi	SAMN03145704		O		11
PWD1	Portuguese Water Dog	SAMN08873219	O	O	11 or 12 or 22	22
PWD10	Portuguese Water Dog	SAMN08873228	O	O	11 or 12 or 22
PWD11	Portuguese Water Dog	SAMN08873229	O	O	11 or 12 or 22	22
PWD2	Portuguese Water Dog	SAMN08873220	O	O	11 or 12 or 22	22
PWD3	Portuguese Water Dog	SAMN08873221	O	O	11 or 12 or 22
PWD4	Portuguese Water Dog	SAMN08873222	O	O	11 or 12 or 22
PWD5	Portuguese Water Dog	SAMN08873223	O	O	11 or 12 or 22	22
PWD6	Portuguese Water Dog	SAMN08873224	O	O	11 or 12 or 22
PWD7	Portuguese Water Dog	SAMN08873225	O	O	11 or 12 or 22	12
PWD8	Portuguese Water Dog	SAMN08873226	O	O	11 or 12 or 22	22
PWD9	Portuguese Water Dog	SAMN08873227	O	O	11 or 12 or 22	22
QID1	Qingchuan Dog	SAMN02485577		O
REW1	Red Wolf	SAMN02921317		O		11
REW2	Red Wolf	SAMN02921318		O
RHR1	Rhodesian Ridgeback	SAMN03801683		O		11
RHR2	Rhodesian Ridgeback	SAMEA4504822		O
RHR3	Rhodesian Ridgeback	SAMEA4505495		O
RHR4	Rhodesian Ridgeback	SAMN06161404		O		11
RHR5	Rhodesian Ridgeback	SAMEA104091554		O		11
ROT1	Rottweiler	SAMN08873243		O	11	11
ROT10	Rottweiler	SAMN08873252		O	11	11
ROT2	Rottweiler	SAMN08873244		O	11	11
ROT3	Rottweiler	SAMN08873245		O	11	11
ROT4	Rottweiler	SAMN08873246		O	11
ROT5	Rottweiler	SAMN08873247		O	11	11
ROT6	Rottweiler	SAMN03801684		O	11	11
ROT7	Rottweiler	SAMEA3121337		O	11
ROT8	Rottweiler	SAMN03323674		O	11	11
ROT9	Rottweiler	SAMN08873251		O	11	11
SAB1	Saint Bernard	SAMN03801685		O	11	11
SAB2	Saint Bernard	SAMN03580386		O	11
SAL1	Saluki	SAMN03801686		O	11	11
SAL2	Saluki	SAMN03801687		O	11
SAL3	Saluki	SAMEA4504825		O	11
SAM1	Samoyed	SAMN08873258		O	11	11
SAM2	Samoyed	SAMN03168388		O	11
SAP1	Sapsaree	KKU	O			22
SAP2	Sapsaree	KKU	O			22
SAP3	Sapsaree	KKU	O			22
SAP4	Sapsaree	KKU	O			11
SAP5	Sapsaree	KKU	O			11
SCD1	Scottish Deerhound	SAMN03580401		O	22	22
SCT1	Scottish Terrier	SAMN03801688		O	22	22
SCT2	Scottish Terrier	SAMN08873262		O	22	22
SCT3	Scottish Terrier	SAMN03580394		O	22	22
SCT4	Scottish Terrier	SAMN08873264		O	22	22
SCW1	Soft Coated Wheaten Terrier	SAMN03323670		O	12 or 22
SCW2	Soft Coated Wheaten Terrier	SAMN03323671		O	12 or 22
SCW3	Soft Coated Wheaten Terrier	SAMN03580410		O	12 or 22
SCW4	Soft Coated Wheaten Terrier	SAMN03580411		O	12 or 22
SHI1	Shiba Inu	SRR8614091	O			11
SHI2	Shiba Inu	SRR8614050	O			11
SHI3	Shiba Inu	SRR7107955	O			11
SHI4	Shiba Inu	SAMN04196861	O			11
SHI5	Shiba Inu	SRR10752637	O			11
SHI6	Shiba Inu	SAMN05770194		O		11
SHS1	Shetland Sheepdog	SAMEA104091573		O		11
SHS2	Shetland Sheepdog	SAMN08873266		O		11
SHS3	Shetland Sheepdog	SAMN03580413		O		11
SIH1	Siberian Husky	SAMN03801690		O		11
SIH2	Siberian Husky	SAMEA3539249		O		11
SIH3	Siberian Husky	SAMN03168389		O
SIH4	Siberian Husky	SAMEA104091559		O		11
SIT1	Shih Tzu	ERR2196281	O		22	22
SIT2	Shih Tzu	SRR7120214	O		22
SIT3	Shih Tzu	ERR3047551	O		22	22
SIT4	Shih Tzu	ERR3047552	O		22	22
SIT5	Shih Tzu	SRR12330189	O		22
SIT6	Shih Tzu	SAMN08873270		O	22
SLO1	Sloughi	SAMEA4506885		O		11
SLO2	Sloughi	SAMEA3928143		O		11
SLO3	Sloughi	SAMEA4506888		O		11
SLO4	Sloughi	SAMN03168392		O		11
SPG1	Spanish Galgo	SAMN03168380		O
SPI1	Spinone Italiano	SAMN06159677		O		22
STP1	Standard Poodle	SAMN06159675		O	22	22
STP2	Standard Poodle	SAMN03801691		O	22
STP3	Standard Poodle	SAMN03580380		O	22	22
STP4	Standard Poodle	SAMN03580408		O	22	22
STS1	Standard Schnauzer	SAMN06159669		O	22	22
STS2	Standard Schnauzer	SAMN06159687		O	22	22
STS3	Standard Schnauzer	SAMN06159688		O	22	22
STS4	Standard Schnauzer	SAMN03323676		O	22
SWD1	Spanish Water Dog	SAMEA3164479		O
SWL1	Swedish Lapphund	SAMN03168387		O
TIM1	Tibetan Mastiff	KKU	O			11
TIM10	Tibetan Mastiff	SAMN02585155	O	O
TIM11	Tibetan Mastiff	SAMN02585156	O	O
TIM12	Tibetan Mastiff	SAMN02585157	O	O
TIM13	Tibetan Mastiff	SAMN02585158	O	O
TIM14	Tibetan Mastiff	SAMN02585159	O	O
TIM15	Tibetan Mastiff	SAMN02585160	O	O
TIM16	Tibetan Mastiff	SAMN01974493	O	O
TIM2	Tibetan Mastiff	KKU	O			11
TIM3	Tibetan Mastiff	KKU	O			11
TIM4	Tibetan Mastiff	KKU	O			11
TIM5	Tibetan Mastiff	KKU	O			11
TIM6	Tibetan Mastiff	SAMN02570458	O	O
TIM7	Tibetan Mastiff	SAMN02585152	O	O
TIM8	Tibetan Mastiff	SAMN02585153	O	O
TIM9	Tibetan Mastiff	SAMN02585154	O	O
TIT1	Tibetan Terrier	SAMN03580403	O	O		22
TIT2	Tibetan Terrier	SAMN03580406	O	O		22
TIT4	Tibetan Terrier	SRR8614021	O
TIT5	Tibetan Terrier	SRR10077572	O			22
TIT6	Tibetan Terrier	SRR10077569	O
TOP1	Toy Poodle	SAMN02485567		O		12
TOR1	Tornjak	SAMN03801692		O
VDA1	Village Dog Aboriginal Camp Dog	SAMEA1521940		O		11
VDB1	Village Dog Borneo	SAMN02485592		O
VDB2	Village Dog Borneo	SAMN02485593		O
VDB3	Village Dog Borneo	SAMN02485594		O
VDC1	Village Dog China	SAMN02485581		O
VDC10	Village Dog China	SAMN02585181		O
VDC11	Village Dog China	SAMN02585182		O
VDC12	Village Dog China	SAMN02585183		O
VDC13	Village Dog China	SAMN02585184		O
VDC14	Village Dog China	SAMN02585185		O
VDC15	Village Dog China	SAMN02585186		O
VDC16	Village Dog China	SAMN02585187		O
VDC17	Village Dog China	SAMN02585188		O
VDC18	Village Dog China	SAMN02585189		O
VDC19	Village Dog China	SAMN02585190		O
VDC2	Village Dog China	SAMN01974490		O
VDC20	Village Dog China	SAMN02585171		O
VDC21	Village Dog China	SAMN02585172		O
VDC22	Village Dog China	SAMN02585173		O
VDC23	Village Dog China	SAMN02585174		O
VDC24	Village Dog China	SAMN02585175		O
VDC25	Village Dog China	SAMN02585176		O
VDC26	Village Dog China	SAMN02585177		O
VDC27	Village Dog China	SAMN02585178		O
VDC28	Village Dog China	SAMN02585179		O
VDC29	Village Dog China	SAMN02585180		O
VDC3	Village Dog China	SAMN01974491		O
VDC30	Village Dog China	SAMN02585161		O
VDC31	Village Dog China	SAMN02585162		O
VDC32	Village Dog China	SAMN02585163		O
VDC33	Village Dog China	SAMN02585164		O
VDC34	Village Dog China	SAMN02585165		O
VDC35	Village Dog China	SAMN02585166		O
VDC36	Village Dog China	SAMN02585167		O
VDC37	Village Dog China	SAMN02585168		O
VDC38	Village Dog China	SAMN02585169		O
VDC39	Village Dog China	SAMN02585170		O
VDC4	Village Dog China	SAMN01974492		O
VDC40	Village Dog China	SAMN04851103		O
VDC41	Village Dog China	SAMN02485575		O
VDC42	Village Dog China	SAMN02485572		O
VDC5	Village Dog China	SAMN02485568		O
VDC6	Village Dog China	SAMN02485569		O
VDC7	Village Dog China	SAMN02485570		O
VDC8	Village Dog China	SAMN02485571		O
VDC9	Village Dog China	SAMN02485576		O
VDE1	Village Dog Egypt	SAMN02485582		O
VDE2	Village Dog Egypt	SAMN02485583		O
VDG1	Village Dog Papua New Guinea	SAMN02485601		O
VDG2	Village Dog Papua New Guinea	SAMN02485602		O
VDG3	Village Dog Papua New Guinea	SAMN02485603		O
VDI1	Village Dog India	SAMN02485586		O
VDI2	Village Dog India	SAMN02485587		O
VDI3	Village Dog India	SAMN02485588		O
VDI4	Village Dog India	SAMN02485590		O
VDI5	Village Dog India	SAMN02485591		O
VDL1	Village Dog Lebanon	SAMN02485595		O
VDL2	Village Dog Lebanon	SAMN02485596		O
VDL3	Village Dog Lebanon	SAMN02485597		O
VDN1	Village Dog Namibia	SAMN02485598		O
VDN2	Village Dog Namibia	SAMN02485599		O
VDN3	Village Dog Namibia	SAMN02485600		O
VDP1	Village Dog Portugal	SAMN04851101		O
VDP2	Village Dog Portugal	SAMN02485604		O
VDP3	Village Dog Portugal	SAMN02485605		O
VDQ1	Village Dog Qatar	SAMN02485606		O
VDQ2	Village Dog Qatar	SAMN02485607		O
VDS1	Village Dog Sub Saharan Africa	SAMN04851104		O
VDT1	Village Dog Taiwan	SAMN02485608		O
VDV1	Village Dog Vietnam	SAMN02485609		O
VDV2	Village Dog Vietnam	SAMN02485610		O
VDV3	Village Dog Vietnam	SAMN02485611		O
VDV4	Village Dog Vietnam	SAMN02485612		O
VDV5	Village Dog Vietnam	SAMN02485613		O
VDV6	Village Dog Vietnam	SAMN02485614		O
VID1	Vietnamese Indigenous Dog	SRR2827595	O
VID10	Vietnamese Indigenous Dog	SAMN03168372		O
VID2	Vietnamese Indigenous Dog	SRR2827596	O
VID3	Vietnamese Indigenous Dog	SRR2827597	O
VID4	Vietnamese Indigenous Dog	SRR2827598	O
VID5	Vietnamese Indigenous Dog	SRR2827599	O
VID6	Vietnamese Indigenous Dog	SAMN03168368		O
VID7	Vietnamese Indigenous Dog	SAMN03168369		O
VID8	Vietnamese Indigenous Dog	SAMN03168370		O
VID9	Vietnamese Indigenous Dog	SAMN03168371		O
VIZ1	Vizsla	SAMEA3724570		O		11
WEI1	Weimaraner	SAMEA4506902		O		11
WHI1	Whippet	SAMEA4506886		O	11	11
WHW1	West Highland White Terrier	SAMN03801693		O	22
WHW10	West Highland White Terrier	SAMEA4509489		O	22	22
WHW11	West Highland White Terrier	SAMEA104091561		O	22	22
WHW2	West Highland White Terrier	SAMN08873423		O	22	22
WHW3	West Highland White Terrier	SAMN03580395		O	22	22
WHW4	West Highland White Terrier	SAMN03580396		O	22	22
WHW5	West Highland White Terrier	SAMN03580397		O	22	22
WHW6	West Highland White Terrier	SAMN03580398		O	22	22
WHW7	West Highland White Terrier	SAMN08873428		O	22
WHW8	West Highland White Terrier	SAMN08873429		O	22	22
WHW9	West Highland White Terrier	SAMEA4506901		O	22
XID1	Xiasi Dog	SAMN02485580		O
XOL1	Xoloitzcuintli	SAMN03168385		O
XOL2	Xoloitzcuintli	SAMN02485566		O
YOT1	Yorkshire Terrier	SAMN08873447		O	22
YOT10	Yorkshire Terrier	SAMN08873456		O	22
YOT11	Yorkshire Terrier	SAMN08873457		O	22
YOT12	Yorkshire Terrier	SAMN08873458		O	22
YOT13	Yorkshire Terrier	SAMN08873459		O	22
YOT14	Yorkshire Terrier	SAMN08873460		O	22
YOT15	Yorkshire Terrier	SAMN08873461		O	22
YOT16	Yorkshire Terrier	SAMN08873462		O	22
YOT17	Yorkshire Terrier	SAMN08873463		O	22
YOT18	Yorkshire Terrier	SAMN08873464		O	22
YOT19	Yorkshire Terrier	SAMN08873465		O	22
YOT2	Yorkshire Terrier	SAMN08873448		O	22
YOT20	Yorkshire Terrier	SAMN08873466		O	22
YOT21	Yorkshire Terrier	SAMN08873467		O	22
YOT22	Yorkshire Terrier	SAMN08873468		O	22
YOT23	Yorkshire Terrier	SAMN08873469		O	22
YOT24	Yorkshire Terrier	SAMN08873470		O	22	22
YOT25	Yorkshire Terrier	SAMN08873471		O	22
YOT26	Yorkshire Terrier	SAMN08873472		O	22
YOT27	Yorkshire Terrier	SAMN08873473		O	22
YOT28	Yorkshire Terrier	SAMN08873474		O	22
YOT29	Yorkshire Terrier	SAMN08873475		O	22
YOT3	Yorkshire Terrier	SAMN08873449		O	22	22
YOT30	Yorkshire Terrier	SAMN08873476		O	22	22
YOT31	Yorkshire Terrier	SAMN08873477		O	22
YOT32	Yorkshire Terrier	SAMN08873478		O	22
YOT33	Yorkshire Terrier	SAMN08873479		O	22
YOT34	Yorkshire Terrier	SAMN08873480		O	22
YOT35	Yorkshire Terrier	SAMN08873481		O	22
YOT36	Yorkshire Terrier	SAMN08873482		O	22
YOT37	Yorkshire Terrier	SAMN08873483		O	22
YOT38	Yorkshire Terrier	SAMN08873484		O	22
YOT39	Yorkshire Terrier	SAMN08873485		O	22
YOT4	Yorkshire Terrier	SAMN08873450		O	22	22
YOT40	Yorkshire Terrier	SAMN08873486		O	22
YOT41	Yorkshire Terrier	SAMN08873487		O	22
YOT42	Yorkshire Terrier	SAMN08873488		O	22
YOT43	Yorkshire Terrier	SAMN08873489		O	22
YOT44	Yorkshire Terrier	SAMN08873490		O	22
YOT45	Yorkshire Terrier	SAMN08873491		O	22
YOT46	Yorkshire Terrier	SAMN08873492		O	22
YOT47	Yorkshire Terrier	SAMN08873493		O	22
YOT48	Yorkshire Terrier	SAMN08873494		O	22
YOT49	Yorkshire Terrier	SAMN08873495		O	22
YOT5	Yorkshire Terrier	SAMN08873451		O	22
YOT50	Yorkshire Terrier	SAMN08873496		O	22	22
YOT51	Yorkshire Terrier	SAMN08873497		O	22
YOT52	Yorkshire Terrier	SAMN08873498		O	22
YOT53	Yorkshire Terrier	SAMN08873499		O	22
YOT54	Yorkshire Terrier	SAMN08873500		O	22
YOT55	Yorkshire Terrier	SAMN08873501		O	22
YOT56	Yorkshire Terrier	SAMN08873502		O	22
YOT57	Yorkshire Terrier	SAMN08873503		O	22
YOT58	Yorkshire Terrier	SAMN08873504		O	22	22
YOT59	Yorkshire Terrier	SAMN08873505		O	22
YOT6	Yorkshire Terrier	SAMN08873452		O	22	22
YOT60	Yorkshire Terrier	SAMN08873506		O	22
YOT61	Yorkshire Terrier	SAMN08873507		O	22
YOT62	Yorkshire Terrier	SAMN08873508		O	22
YOT63	Yorkshire Terrier	SAMN08873509		O	22
YOT64	Yorkshire Terrier	SAMN08873510		O	22
YOT65	Yorkshire Terrier	SAMN08873511		O	22
YOT66	Yorkshire Terrier	SAMN08873512		O	22
YOT67	Yorkshire Terrier	SAMN08873513		O	22
YOT68	Yorkshire Terrier	SAMN08873514		O	22
YOT69	Yorkshire Terrier	SAMN08873515		O	22
YOT7	Yorkshire Terrier	SAMN08873453		O	22
YOT70	Yorkshire Terrier	SAMN08873516		O	22
YOT71	Yorkshire Terrier	SAMN08873517		O	22
YOT72	Yorkshire Terrier	SAMN08873518		O	22
YOT73	Yorkshire Terrier	SAMN08873519		O	22
YOT74	Yorkshire Terrier	SAMEA3928145		O	22	22
YOT75	Yorkshire Terrier	SAMN04195509		O	22	22
YOT8	Yorkshire Terrier	SAMN08873454		O	22	22
YOT9	Yorkshire Terrier	SAMN08873455		O	22
RSPO2 allele desgination: 1, RSPO2-wildtype; 2, RSPO2-repeat
RSPO2 genotype (reported): Genotyping data retireved from Cadieu et al. (2009). Only the genotyping results of breeds with typing results more than three individuals are used.
RSPO2 genotype (predicted): Predicted RSPO2 insertion genotype based on phased haplotypes identified in this study.
The samples included for sample groups 1 and 2 are indicated by "O". RSPO2 genotype (predicted) is the result of our prediction based on the haplotype information

## Sheet: Table S2
Table S2. List of the hair-length data of the 114 Sapsaree dogs used in this study
Sample name	Hair length
0A1155	Long
0A1224	Long
0A1241	Long
0A1247	Long
0A1304	Long
0A1394	Long
0A1417	Long
0A1420	Long
0A1441	Long
0A1482	Long
0A1512	Long
0A1590	Long
0A1600	Long
0C0666	Long
0C0970	Long
0D0001	Long
0D0002	Long
0D0004	Long
0D0006	Long
0D0007	Long
0D0008	Long
0D0030	Long
0D0050	Long
0D0086	Long
0D0105	Long
0D0122	Long
0D0123	Long
0D0129	Long
0D0133	Long
0D0134	Long
0D0138	Long
0D0142	Long
0D0143	Long
0D0144	Long
0D0146	Long
0D0148	Long
0D0152	Long
0D0154	Long
0D0158	Long
0D0160	Long
0D0178	Long
0D0181	Long
0D0182	Long
0D0186	Long
0D0187	Long
0D0188	Long
0D0189	Long
0D0190	Long
0D0191	Long
0D0192	Long
0D0193	Long
0D0196	Long
0D0235	Long
0D0236	Long
0D0237	Long
0D0238	Long
0D0241	Long
0D0269	Long
0D0276	Long
0D0279	Long
3A0686	Long
0H0031	Short
0H0069	Short
0H0075	Short
0H0086	Short
0H0088	Short
0H0092	Short
0H0156	Short
0H0157	Short
0H0166	Short
0H0170	Short
0H0172	Short
0H0175	Short
0H0177	Short
0H0189	Short
0H0198	Short
0H0203	Short
0H0215	Short
0H0216	Short
0H0217	Short
0H0218	Short
0H0221	Short
0H0222	Short
0H0227	Short
0H0240	Short
0H0242	Short
0H0243	Short
0H0244	Short
0H0245	Short
0H0246	Short
0H0247	Short
0H0254	Short
0H0255	Short
0H0256	Short
0H0257	Short
0H0269	Short
0H0270	Short
0H0272	Short
0H0274	Short
0H0279	Short
0H0282	Short
0H0283	Short
0H0287	Short
0H0290	Short
0H0295	Short
0H0296	Short
0H0297	Short
0H0298	Short
0H0299	Short
0H0300	Short
0H0301	Short
0H0302	Short
0H0303	Short
0H0304	Short

## Sheet: Table S3
Table S3. Results of GWAS analysis from the typing results of 114 Sapsarees genotyped on 170K CanineHD BeadChip
Chromosome	SNP Position	P-value
1	511277	0.118174
1	753378	0.638807
1	790404	0.638807
1	802359	0.638807
1	822555	0.638807
1	840555	0.524076
1	867177	0.638807
1	874172	0.638807
1	889117	0.638807
1	896951	0.638807
1	912356	0.638807
1	921159	0.638807
1	963279	0.638807
1	968152	0.638807
1	997568	0.726829
1	1012024	0.658106
1	1030993	0.726829
1	1036086	0.726829
1	1048637	0.726829
1	1049666	0.726829
1	1062891	0.638807
1	1074156	0.638807
1	1084288	0.658106
1	1101117	0.658106
1	1110911	0.658106
1	1132340	0.658106
1	1164707	0.658106
1	1178399	0.42184
1	1214774	0.42184
1	1326088	0.658106
1	1384838	0.658106
1	1400426	0.658106
1	1413914	0.658106
1	1430423	0.658106
1	1460648	0.658106
1	1499313	0.658106
1	1544590	0.658106
1	1722438	0.171833
1	1728485	0.638807
1	1759968	0.638807
1	1779875	0.645175
1	1785323	0.645175
1	1786997	0.177729
1	1796182	0.645175
1	1810947	0.638807
1	1873919	0.645175
1	1896142	0.638807
1	2048128	0.658106
1	2175231	0.658106
1	2208277	0.658106
1	2289441	0.456426
1	2815013	0.221149
1	3194397	0.374893
1	3200422	0.0752012
1	3274017	0.0954972
1	3374684	0.658106
1	3419580	0.223311
1	3428195	0.333255
1	3480810	0.206601
1	3760558	0.0399932
1	3796640	0.16214
1	3828021	0.651608
1	3946665	0.296317
1	3964544	0.175193
1	3967481	0.296317
1	4172445	0.756326
1	4174806	0.787042
1	4204443	0.274034
1	4227095	0.819031
1	4239459	0.274034
1	4245417	0.274034
1	4272138	0.626263
1	4283592	0.274034
1	4426123	0.333255
1	4450046	0.333255
1	4459378	0.333255
1	4469990	0.333255
1	4475164	0.333255
1	4485474	0.333255
1	4499421	0.333255
1	4523008	0.333255
1	4534732	0.360487
1	4575316	0.339955
1	4590874	0.296317
1	4600818	0.208619
1	4628170	0.296317
1	4680550	0.296317
1	4700786	0.296317
1	4711650	0.296317
1	4725113	0.296317
1	4726836	0.296317
1	4748284	0.296317
1	4757417	0.296317
1	4764376	0.296317
1	4809432	0.296317
1	4836401	0.296317
1	4878941	0.787042
1	4886951	0.413619
1	4893108	0.787042
1	4901016	0.787042
1	4911941	0.227699
1	4928973	0.787042
1	4939210	0.382331
1	4942312	0.367602
1	4951927	0.0843287
1	4979308	0.333255
1	5006108	0.0982819
1	5013851	0.302171
1	5016106	0.178621
1	5026727	0.456426
1	5044074	0.456426
1	5059152	0.326788
1	5122651	0.206601
1	5141525	0.206601
1	5196785	0.206601
1	5211086	0.206601
1	5244422	0.206601
1	5310127	0.0251544
1	5323473	0.191163
1	5325340	0.191163
1	5344916	0.206601
1	5355930	0.389919
1	5361620	0.434486
1	5394934	0.175193
1	5409586	0.860885
1	5420699	0.0788754
1	5441353	0.299229
1	5452889	0.299229
1	5471709	0.413619
1	5477202	0.187491
1	5486246	0.447517
1	5523125	0.386106
1	5547867	0.24615
1	5561736	0.24615
1	5579289	0.216889
1	5589651	0.24615
1	5600922	0.386106
1	5619955	0.118174
1	5673842	0.645175
1	5721194	0.787042
1	5748787	0.787042
1	5779816	0.413619
1	5786011	0.413619
1	5795837	0.413619
1	5808242	0.413619
1	5818706	0.382331
1	5837420	0.382331
1	5844519	0.413619
1	5859958	0.413619
1	6003372	0.407964
1	6020825	0.407964
1	6052112	0.346583
1	6096061	0.591309
1	6107781	0.591309
1	6128352	0.852344
1	6139857	0.6713
1	6154774	0.6713
1	6162357	0.6713
1	6188790	0.6713
1	6198709	0.6713
1	6218800	0.178621
1	6224919	0.178621
1	6263554	0.24615
1	6283052	0.456426
1	6297308	0.6713
1	6304660	0.0251544
1	6315377	0.0251544
1	6324819	0.0251544
1	6352738	0.221149
1	6358902	0.651608
1	6370172	0.6713
1	6379490	0.178621
1	6427277	0.155989
1	6447040	0.810911
1	6453921	0.155989
1	6465949	0.155989
1	6474333	0.155989
1	6539253	0.638807
1	6581162	0.951251
1	6613794	0.951251
1	6627776	0.951251
1	6636016	0.572844
1	6675256	0.607915
1	6684616	0.6556
1	6693398	0.19873
1	6710663	0.607915
1	6721693	0.819031
1	6736449	0.607915
1	6737483	0.607915
1	6787592	0.638807
1	6797293	0.413619
1	6825957	0.638807
1	6844921	0.787042
1	6855643	0.787042
1	6865364	0.852344
1	6879261	0.223311
1	6892064	0.266124
1	6899092	0.266124
1	6996338	0.255939
1	7020134	0.0116433
1	7037523	0.53452
1	7050340	0.970454
1	7075191	0.18036
1	7143332	0.632503
1	7175735	0.302171
1	7258510	0.0827326
1	7363714	0.407964
1	7482135	0.232176
1	7513442	0.407964
1	7551941	0.255939
1	7554163	0.255939
1	7571195	0.127384
1	7578528	0.127384
1	7618214	0.128616
1	7635258	0.128616
1	7657707	0.407964
1	7707189	0.296317
1	7720714	0.835518
1	7729393	0.835518
1	7838613	0.913999
1	7890465	0.178621
1	7898583	0.178621
1	7909532	0.932436
1	7915508	0.852344
1	7925031	0.123758
1	7935005	0.493904
1	7947534	0.117946
1	7960539	0.114593
1	7960988	0.114593
1	7969723	0.221149
1	7979804	0.223311
1	8001795	0.960804
1	8022725	0.595988
1	8044418	0.221149
1	8048010	0.819031
1	8054483	0.24615
1	8084756	0.208619
1	8095387	0.239059
1	8111989	0.518904
1	8117798	0.835518
1	8130890	0.474788
1	8143422	0.367602
1	8268652	0.529262
1	8321430	0.094631
1	8352934	0.407964
1	8394376	1
1	8411036	0.407964
1	8430205	1
1	8443239	0.869514
1	8455231	0.426013
1	8463865	0.529262
1	8486192	0.489052
1	8497677	0.266124
1	8514900	0.178621
1	8546882	0.26354
1	8573470	0.157505
1	8595207	0.878231
1	8604276	0.407964
1	8613543	1
1	8630247	0.561617
1	8647955	0.990051
1	8697663	0.124954
1	8711821	0.719639
1	8717703	0.719639
1	8746315	0.719639
1	8751574	0.556088
1	8762788	0.556088
1	8775014	0.556088
1	8785475	0.556088
1	8833676	0.819031
1	8847422	0.489052
1	8863032	0.489052
1	8870689	1
1	8878416	1
1	8903354	0.360455
1	8975122	0.311173
1	8980525	0.0524042
1	9010909	0.763889
1	9017633	0.887037
1	9094017	0.279439
1	9096236	0.279439
1	9120663	0.0604171
1	9159357	0.107142
1	9166089	0.360455
1	9187067	0.212864
1	9190035	0.545195
1	9224106	0.513803
1	9257013	0.664669
1	9296248	0.0226989
1	9309123	0.154489
1	9338347	0.485405
1	9354482	0.763889
1	9396188	0.913999
1	9406695	0.913999
1	9420442	0.913999
1	9428903	0.913999
1	9440183	0.913999
1	9464337	0.393771
1	9477943	0.658106
1	9502938	0.951251
1	9526549	0.24856
1	9578777	0.794918
1	9592401	0.518904
1	9604233	0.204604
1	9612915	0.305141
1	9629445	0.175193
1	9638283	0.204604
1	9728738	0.645175
1	9752154	0.980202
1	9812380	0.465515
1	9826231	0.465515
1	9834647	0.485405
1	9862442	0.407964
1	9875555	0.126163
1	9881751	0.374893
1	9882263	0.308142
1	9897935	0.645175
1	9968034	0.951252
1	10008027	0.407964
1	10027540	0.0845063
1	10060855	0.234618
1	10064727	0.393771
1	10203781	0.343201
1	10231948	0.827232
1	10238823	0.869523
1	10255636	0.698526
1	10257096	0.394086
1	10271503	0.508773
1	10283002	0.39781
1	10309970	0.42184
1	10329292	0.0731226
1	10341135	0.0179859
1	10357617	0.607915
1	10403384	0.932436
1	10408315	1
1	10419139	0.28515
1	10508512	0.232176
1	10539614	0.941798
1	10549938	0.250995
1	10604319	0.364173
1	10683500	0.217065
1	10699423	0.465515
1	10744350	0.960805
1	10756573	0.465515
1	10792454	0.37875
1	10807939	0.664772
1	10919483	0.494155
1	10934077	0.748839
1	10961544	0.308409
1	10984474	0.154127
1	11040857	0.109552
1	11052005	0.465515
1	11074423	0.146341
1	11091891	0.103388
1	11111953	0.572906
1	11119991	0.0187716
1	11147113	0.658106
1	11187180	0.219095
1	11192441	0.748839
1	11238658	0.508855
1	11286624	0.182116
1	11298106	0.382519
1	11304518	0.556208
1	11368842	0.19873
1	11465332	0.0316059
1	11539753	0.852347
1	11564083	0.887049
1	11608580	0.209037
1	11623152	0.139313
1	11629081	0.104102
1	11653215	0.539959
1	11679629	0.143191
1	11689281	0.960805
1	11744340	0.322074
1	11789480	0.244065
1	11834885	0.16058
1	11844563	0.123758
1	11875141	0.479517
1	11884008	0.0930209
1	11928596	0.887044
1	11951448	0.584421
1	12007076	0.719688
1	12024782	0.169763
1	12101184	0.691631
1	12124292	0.314621
1	12144103	0.0595357
1	12191961	0.990051
1	12203650	0.843899
1	12268168	0.73411
1	12284259	0.663787
1	12292936	0.261461
1	12305086	0.104102
1	12326997	0.990051
1	12391795	0.0606077
1	12418403	0.503948
1	12481044	0.479683
1	12488548	0.705477
1	12502470	0.253455
1	12674746	0.0261418
1	12703724	0.63255
1	12724538	0.144391
1	12732415	0.144391
1	12831740	0.584299
1	12843349	0.508753
1	12863961	0.258447
1	12946001	0.326788
1	12954634	0.131118
1	12978143	0.128616
1	12985295	0.128616
1	13003212	0.144391
1	13044677	0.144391
1	13057467	0.136271
1	13065849	0.556088
1	13085178	0.550614
1	13178719	0.0200329
1	13214008	0.518904
1	13298012	0.479495
1	13306777	0.210043
1	13355961	0.479495
1	13369932	0.128616
1	13412399	0.0696811
1	13428072	0.0696811
1	13446742	0.0696811
1	13454177	0.0696811
1	13463880	0.0696811
1	13478424	0.0696811
1	13493435	0.645175
1	13506057	0.595988
1	13523929	0.595988
1	13554172	0.498804
1	13567459	1
1	13585953	0.887796
1	13590516	0.529262
1	13601070	0.887796
1	13610738	0.887796
1	13629913	0.529262
1	13635403	0.529262
1	13723229	0.44313
1	13759668	0.684764
1	13773492	0.684764
1	13822697	0.951251
1	13829372	0.835518
1	13842621	0.463996
1	13857178	0.173505
1	13861908	0.980202
1	13873480	0.835518
1	13898860	0.0183699
1	13966852	0.869514
1	13987701	0.206601
1	14000177	0.895933
1	14038517	0.705477
1	14051040	0.920526
1	14058776	0.639968
1	14089087	0.920526
1	14100367	0.607915
1	14120734	0.779246
1	14124297	0.779246
1	14133089	0.779246
1	14171000	0.120236
1	14173454	0.120236
1	14187541	0.119086
1	14201871	0.869514
1	14217295	0.119086
1	14226811	0.584299
1	14231717	0.0192867
1	14248782	0.869514
1	14252712	0.869514
1	14333504	0.771528
1	14389797	0.771528
1	14391559	0.336537
1	14416073	0.393771
1	14429234	0.941796
1	14465969	0.771528
1	14559119	0.430228
1	14563023	0.430228
1	14594581	0.430228
1	14615890	0.430228
1	14651579	0.430228
1	14673982	0.430228
1	14732871	0.658106
1	14736839	0.658106
1	14771450	0.658106
1	14785901	0.658106
1	14821310	0.980202
1	14830785	0.470128
1	14849733	0.206601
1	14866292	0.489052
1	14892273	0.787042
1	14937979	0.658106
1	14969369	0.129861
1	14977014	0.0246491
1	14988276	0.0246491
1	15014153	0.869514
1	15031630	0.250995
1	15036132	0.990051
1	15053383	0.741428
1	15080381	0.24856
1	15108508	0.0992283
1	15116966	0.741428
1	15186332	0.163716
1	15199402	0.163716
1	15204569	0.170177
1	15218485	0.170177
1	15230599	0.163716
1	15248017	0.225494
1	15266342	0.163716
1	15321057	0.102124
1	15364978	0.250995
1	15372503	0.802874
1	15380050	0.92317
1	15391799	0.752429
1	15411076	0.752429
1	15418100	0.0658133
1	15491995	0.290579
1	15511136	0.268735
1	15544090	0.122572
1	15553192	0.122572
1	15590031	0.0514208
1	15598773	0.0216649
1	15612220	0.113497
1	15635861	0.0242316
1	15673409	0.0233433
1	15736401	0.112412
1	15794393	0.752429
1	15805483	0.0781262
1	15816348	0.138925
1	15840316	0.112412
1	15852260	0.601921
1	15920290	0.133669
1	15948746	0.0273637
1	15962377	0.752429
1	15970326	0.638807
1	16013787	0.0766495
1	16024354	0.684764
1	16045803	0.518904
1	16053508	0.638807
1	16078323	0.852344
1	16106412	0.178621
1	16138985	0.0148035
1	16231036	0.503753
1	16428724	0.752429
1	16440171	0.0294931
1	16461127	0.0766495
1	16508273	0.578542
1	16531663	0.191163
1	16546927	0.191163
1	16591910	0.239059
1	16820003	0.364265
1	16872021	0.438786
1	16876417	0.438786
1	16889483	0.232176
1	16923606	0.089308
1	16936332	0.314234
1	16947053	0.0835268
1	16968037	0.498804
1	16983628	0.498804
1	17038060	0.651608
1	17080855	0.566832
1	17081733	0.339853
1	17090951	0.302171
1	17100543	0.479495
1	17125112	0.434486
1	17128451	0.339853
1	17135819	0.434486
1	17171273	0.226378
1	17200947	0.166915
1	17212415	0.111337
1	17249128	0.371229
1	17274039	0.141631
1	17278430	0.015795
1	17302397	0.0454709
1	17382980	0.401591
1	17419125	0.566832
1	17443755	0.371229
1	17463345	0.208619
1	17464820	0.0539153
1	17524497	0.0621638
1	17536104	0.0539153
1	17548401	0.0235622
1	17575316	0.401591
1	17587551	0.0651902
1	17589724	0.0835268
1	17610117	0.320448
1	17612158	0.0242316
1	17631438	0.206601
1	17635786	0.752429
1	17646203	0.426013
1	17659479	0.0936856
1	17704361	0.0242316
1	17709766	0.0242316
1	17712307	0.0242316
1	17726062	0.364011
1	17726883	0.664669
1	17743906	0.206601
1	17765993	0.493904
1	17773356	0.843888
1	17796222	0.0490438
1	17824831	0.0581655
1	17840485	0.752429
1	17846763	0.302171
1	17860709	0.274034
1	17870438	0.171833
1	17889488	0.279439
1	17927062	0.578542
1	17939101	0.268735
1	17963447	0.0859563
1	17972306	0.134964
1	17981639	0.0859563
1	17998067	0.364011
1	18015181	0.0314945
1	18036411	0.0242316
1	18039988	0.364011
1	18107386	0.0242316
1	18120975	0.0859563
1	18131176	0.371229
1	18154349	0.0859563
1	18164999	0.134964
1	18196519	0.741428
1	18230234	0.651608
1	18246942	0.651608
1	18257851	0.100184
1	18268077	0.0615759
1	18279276	0.0242316
1	18301303	0.234447
1	18322316	0.0884578
1	18351745	0.578542
1	18372431	0.578542
1	18383320	0.578542
1	18394807	0.159035
1	18408043	0.150076
1	18417394	0.0490438
1	18440810	0.296317
1	18464410	0.409569
1	18481237	0.360455
1	18491257	0.44313
1	18514470	0.182116
1	18524177	0.0910335
1	18543235	0.100184
1	18588383	0.117946
1	18593202	0.0884578
1	18603592	0.106119
1	18618404	0.299229
1	18727675	0.578542
1	18753645	0.0383694
1	18772717	0.19501
1	18773975	0.159035
1	18811386	0.518904
1	18973503	0.0383694
1	19015038	0.389919
1	19035158	0.92317
1	19041152	0.0383694
1	19069941	0.389919
1	19088174	0.0383694
1	19109733	0.389919
1	19122439	0.24615
1	19133517	0.389919
1	19145641	0.0383694
1	19153101	0.0383694
1	19165031	0.0859563
1	19176612	0.214791
1	19191686	0.503741
1	19219616	0.503741
1	19229815	0.503741
1	19231810	0.214791
1	19238089	0.607915
1	19247015	0.122572
1	19260476	0.371229
1	19281794	0.0796319
1	19316603	0.271371
1	19361613	0.266124
1	19371454	0.438786
1	19385401	0.271371
1	19418649	0.282183
1	19430743	0.752429
1	19444356	0.0796319
1	19458982	0.311173
1	19492481	0.44313
1	19503280	0.305141
1	19515473	0.787042
1	19528106	0.887037
1	19534046	0.887037
1	19555684	0.333255
1	19594047	0.658106
1	19615058	0.343201
1	19636509	0.447517
1	19641020	0.374893
1	19652084	0.578542
1	19667530	0.143004
1	19670479	0.214791
1	19719094	0.508753
1	19739556	0.339853
1	19742741	0.508753
1	19757907	0.508753
1	19763752	0.508753
1	19776432	0.326788
1	19857021	0.305141
1	19870526	0.287752
1	19883562	0.148634
1	19904981	0.465515
1	19916674	0.367602
1	19932466	0.638807
1	19934494	0.691599
1	19968487	0.794918
1	19984274	0.90492
1	20015759	0.200669
1	20032821	0.326788
1	20054348	0.155989
1	20068199	0.90492
1	20077410	0.287752
1	20088635	0.305141
1	20101318	0.255939
1	20105332	0.227699
1	20161099	0.214791
1	20167563	0.214791
1	20187696	0.214791
1	20202305	0.430228
1	20219208	0.503741
1	20292792	0.550614
1	20336471	0.374893
1	20341163	0.374893
1	20360804	0.719639
1	20382519	0.719639
1	20387883	0.719639
1	20425939	0.752429
1	20450940	0.193712
1	20479325	0.719639
1	20513461	0.756326
1	20523711	0.719639
1	20590614	0.260981
1	20592090	0.260981
1	20625819	0.794918
1	20638142	0.794918
1	20659006	0.465515
1	20679215	0.430228
1	20687372	0.364011
1	20718841	0.129861
1	20735772	0.241399
1	20751208	0.129861
1	20781808	0.651608
1	20808866	0.607915
1	20814625	0.545195
1	20824994	0.545195
1	20851127	0.129861
1	20868404	0.339853
1	21141240	0.752429
1	21234762	0.39769
1	21303540	0.869514
1	21305612	0.734091
1	21326275	0.734091
1	21328310	0.430228
1	21339611	0.53452
1	21357214	0.734091
1	21393173	0.691599
1	21404855	0.658106
1	21426179	0.578542
1	21442964	0.787042
1	21457490	0.658106
1	21482426	0.90492
1	21508750	0.447517
1	21545361	0.266124
1	21612216	0.752429
1	21616186	0.835518
1	21720247	0.752429
1	21739547	0.647671
1	21759367	0.752429
1	21779972	0.223311
1	21796081	0.960804
1	21810391	0.960804
1	21841917	0.176899
1	21855124	0.503753
1	21875503	0.255939
1	21888516	0.626263
1	21895847	0.255939
1	21911233	0.266124
1	22062401	0.13562
1	22091645	0.227699
1	22099323	0.258447
1	22115291	0.539831
1	22119320	0.539831
1	22132707	0.651608
1	22180137	0.266124
1	22249905	0.503753
1	22261510	0.887037
1	22261632	0.887037
1	22269586	0.990051
1	22280404	0.887037
1	22296505	0.827232
1	22322240	0.333255
1	22333250	0.0973446
1	22342955	0.0973446
1	22349515	0.339853
1	22362391	0.878231
1	22385198	0.763889
1	22401970	0.255939
1	22414085	0.13562
1	22453484	0.752429
1	22459007	0.595988
1	22463987	0.6713
1	22469558	0.524057
1	22535450	0.0919089
1	22550996	0.126163
1	22567562	0.0458243
1	22576847	0.147206
1	22580584	0.147206
1	22591074	0.147206
1	22602310	0.389919
1	22614424	0.645175
1	22626734	0.260981
1	22650364	0.0519101
1	22664957	0.417709
1	22687856	0.691599
1	22695450	0.0651902
1	22715597	0.106119
1	22724505	0.157505
1	22732375	0.595988
1	22740877	0.266124
1	22778046	0.0458243
1	22800993	0.214791
1	22810136	0.143004
1	22823138	0.555327
1	22922850	0.0333199
1	22932586	0.489052
1	22978436	0.113497
1	22989459	0.430228
1	23044893	0.595988
1	23079472	0.367602
1	23123610	0.584299
1	23161548	0.474788
1	23183736	0.802874
1	23204599	0.819031
1	23211687	0.658106
1	23258920	0.320448
1	23270803	0.852344
1	23285268	0.0495101
1	23285940	0.607915
1	23292256	0.456426
1	23316876	0.320448
1	23422411	0.787042
1	23446470	0.913999
1	23453064	0.456426
1	23468581	0.456426
1	23498852	0.0369511
1	23514610	0.474788
1	23531388	0.493904
1	23531720	0.493904
1	23535172	0.120236
1	23579207	0.0458243
1	23581336	0.0326997
1	23625329	0.276762
1	23634519	0.0472229
1	23652028	0.539831
1	23670388	0.607915
1	23675365	0.607915
1	23701799	0.219009
1	23730311	0.225494
1	23773565	0.941796
1	23776404	0.355769
1	23776600	0.355769
1	23798188	0.941796
1	23804103	0.539831
1	23814422	0.355769
1	23821683	0.355769
1	23834410	0.960804
1	23861651	0.417709
1	23870986	0.140271
1	23894323	0.0773842
1	23919059	0.0773842
1	23954801	0.0773842
1	23964238	0.0773842
1	23980200	0.498804
1	24001477	0.0476716
1	24006071	0.0476716
1	24024856	0.378593
1	24032460	0.0524042
1	24042626	0.0524042
1	24056431	0.0827326
1	24065845	0.498804
1	24076060	0.0524042
1	24083930	0.664669
1	24088277	0.103108
1	24097438	0.645175
1	24143018	0.133669
1	24158740	0.498804
1	24174220	0.0827326
1	24185121	0.0827326
1	24192886	0.664669
1	24211435	0.607915
1	24222155	0.607915
1	24257314	0.378593
1	24272711	0.417709
1	24322562	0.284954
1	24336537	0.378593
1	24343355	0.852344
1	24344208	0.386106
1	24351971	0.386106
1	24364734	0.386106
1	24387112	0.219009
1	24417633	0.0827326
1	24427550	0.0827326
1	24442215	0.555327
1	24506304	0.0865855
1	24516067	0.0865855
1	24528357	0.0865855
1	24544483	0.0865855
1	24554257	0.0819461
1	24597626	0.645175
1	24604895	0.223311
1	24617129	0.651608
1	24621078	0.664669
1	24643635	0.140271
1	24710385	0.0796319
1	24724808	0.116817
1	24738416	0.116817
1	24763508	0.116817
1	24795748	0.0723876
1	24872931	0.116817
1	24893106	0.734091
1	24970579	0.0514208
1	25019808	0.19873
1	25034146	0.19873
1	25044773	0.253455
1	25074450	0.561617
1	25085969	0.429064
1	25160978	0.287752
1	25170162	0.42184
1	25194333	0.0336344
1	25209358	0.343201
1	25241661	0.0514208
1	25260412	0.748839
1	25272482	0.126163
1	25283411	0.0336344
1	25289424	0.0645732
1	25311040	0.0524042
1	25351540	0.44313
1	25385881	0.0514208
1	25417101	0.343201
1	25425804	0.42184
1	25429477	0.429064
1	25621297	0.539831
1	25638139	0.117946
1	25645025	0.0336344
1	25659010	0.0336344
1	25695626	0.0453053
1	25708335	0.279731
1	25714140	0.28779
1	25770887	0.741428
1	25793141	0.378593
1	25798483	0.607915
1	25801067	0.607915
1	25838266	0.0357376
1	25889659	0.748839
1	25973253	0.556088
1	25979361	0.229926
1	25993251	0.578542
1	26011430	0.734091
1	26044599	0.033952
1	26055085	0.460948
1	26095136	0.35
1	26144928	0.16058
1	26156743	0.137592
1	26170953	0.524057
1	26180965	0.397661
1	26193421	0.447517
1	26207215	0.374893
1	26240082	0.0703479
1	26266774	0.234447
1	26288257	0.409569
1	26293324	0.191163
1	26307304	0.40556
1	26313474	0.109219
1	26330301	0.109219
1	26368937	0.719639
1	26384196	0.409569
1	26391998	0.607915
1	26438930	0.613969
1	26457060	0.229926
1	26482551	0.638807
1	26485950	0.0811672
1	26516342	0.0811672
1	26523535	0.346583
1	26599683	0.92317
1	26630051	0.214791
1	26646523	0.53452
1	26736172	0.378593
1	26763919	0.719639
1	26775069	0.878231
1	26837876	0.613969
1	26863343	0.802874
1	26901420	0.618074
1	26948120	0.236742
1	26964727	0.638807
1	26982618	0.638807
1	26988742	0.0165444
1	26999228	0.470128
1	27010505	0.108176
1	27032573	0.360455
1	27036608	0.173505
1	27050001	0.572844
1	27065775	0.638807
1	27072157	0.590114
1	27075592	0.53452
1	27082072	0.53452
1	27109036	0.860885
1	27115230	0.364265
1	27131601	0.561617
1	27159789	0.970454
1	27181416	0.895933
1	27189938	0.479495
1	27239311	0.364265
1	27263289	0.40556
1	27279310	0.40556
1	27286844	0.0954972
1	27300794	0.470128
1	27350928	0.302171
1	27357008	0.40556
1	27367488	0.601921
1	27387938	0.556088
1	27393839	0.887037
1	27412979	0.719639
1	27457651	0.980202
1	27469100	0.638807
1	27469125	0.638807
1	27474445	0.24856
1	27506312	0.148634
1	27516846	0.148634
1	27532770	0.601921
1	27542326	0.148634
1	27558586	0.691599
1	27564457	0.691599
1	27596835	0.698503
1	27645842	0.116817
1	27698746	0.236742
1	27706859	0.143004
1	27722553	0.143004
1	27730819	0.120236
1	27739280	0.236742
1	27742866	0.120236
1	27819151	0.290579
1	27832093	0.756326
1	27843424	0.120236
1	27860195	0.572844
1	27888848	0.878231
1	27901798	0.712522
1	27914356	0.618074
1	27924114	0.296317
1	27937811	0.618074
1	27945221	0.719639
1	27963241	0.607915
1	27967727	0.684764
1	27987683	0.53452
1	28032774	0.677998
1	28085701	0.572844
1	28092176	0.572844
1	28116668	0.107142
1	28172096	0.438786
1	28182623	0.438786
1	28190579	0.438786
1	28197783	0.24856
1	28402306	0.810911
1	28474148	0.719639
1	28496226	0.296317
1	28508765	0.638807
1	28521780	0.638807
1	28549864	0.638807
1	28562764	0.489052
1	28578350	0.941796
1	28578927	0.941796
1	28631967	0.202627
1	28651055	0.296317
1	28657743	0.90492
1	28667043	0.561617
1	28679956	0.980202
1	28728244	0.124954
1	28740349	0.382331
1	28762329	0.296317
1	28784627	0.236742
1	28802594	0.980202
1	28802611	0.980202
1	28805102	0.980202
1	28848094	0.712522
1	28888166	0.810911
1	28897877	0.810911
1	28945936	0.802874
1	28977145	0.282183
1	29013487	0.960804
1	29033626	0.960804
1	29039198	0.960804
1	29047031	0.960804
1	29058933	0.960804
1	29071540	0.53452
1	29077740	0.53452
1	29082710	0.53452
1	29091710	0.53452
1	29106045	0.144391
1	29112756	0.144391
1	29219791	0.590114
1	29250013	0.524057
1	29260841	0.163716
1	29292151	0.951251
1	29298848	0.960804
1	29341142	0.53452
1	29429098	0.0992283
1	29448880	0.843888
1	29457365	0.572844
1	29523677	0.970454
1	29673713	0.194909
1	29677815	0.42184
1	29686599	0.42184
1	29711070	0.802874
1	29727306	0.0803958
1	29736484	0.194909
1	29763177	0.819031
1	29823423	0.239059
1	29824836	0.417709
1	29847127	0.771528
1	29869145	0.869514
1	29870030	0.239059
1	29901956	0.465515
1	29904481	0.638807
1	29928289	0.239059
1	29945571	0.53452
1	29957422	0.626263
1	29970719	0.638807
1	30011276	0.913999
1	30021046	0.451872
1	30031361	0.990051
1	30043163	0.626263
1	30054556	0.90492
1	30116436	0.852344
1	30132265	0.184905
1	30159880	0.664669
1	30218928	0.794918
1	30231620	0.756326
1	30254867	0.895933
1	30308408	0.16214
1	30344356	0.645175
1	30373185	0.810911
1	30386490	0.92317
1	30406096	0.53452
1	30419209	1
1	30424188	0.210656
1	30433850	0.210656
1	30459913	0.202627
1	30471314	0.508753
1	30483459	0.810911
1	30507609	0.243762
1	30550857	0.726829
1	30565395	0.243762
1	30571585	0.243762
1	30586921	0.339853
1	30654148	0.19873
1	30686579	0.677998
1	30701467	0.771528
1	30710964	0.556088
1	30763631	0.1157
1	30775785	0.0717011
1	30787661	0.0717011
1	30787886	0.0717011
1	30802050	0.182116
1	30836015	0.465515
1	30841608	0.0927929
1	30881047	0.0766495
1	30885375	0.0766495
1	30899559	0.229926
1	30912827	0.229926
1	30987806	0.734091
1	31024074	0.719639
1	31038163	0.632503
1	31043078	0.632503
1	31063953	0.299229
1	31079725	0.287752
1	31094033	0.970454
1	31104710	0.970454
1	31113165	0.620085
1	31124474	0.168538
1	31134846	0.763889
1	31148144	0.763889
1	31167515	0.763889
1	31180025	0.470128
1	31203283	0.763889
1	31218562	0.763889
1	31227727	0.726829
1	31241431	0.852344
1	31289631	0.556088
1	31340191	0.470128
1	31357274	0.590114
1	31382696	0.333255
1	31392759	0.980202
1	31429982	0.878231
1	31437465	0.990051
1	31480156	0.333255
1	31493456	0.409569
1	31506313	0.333255
1	31518939	0.333255
1	31565108	0.951251
1	31584995	0.734091
1	31595692	0.787042
1	31609093	0.980202
1	31695298	0.474788
1	31703587	0.620085
1	31707660	0.620085
1	31722725	0.645175
1	31741885	0.645175
1	31748671	0.645175
1	31761332	0.819031
1	31796427	0.561617
1	31867335	0.317361
1	31894464	0.658106
1	31914851	0.268735
1	32012061	0.756326
1	32022269	0.330005
1	32038665	0.397661
1	32054404	0.827232
1	32060482	0.827232
1	32261469	0.489052
1	32272858	0.24615
1	32277293	0.802874
1	32289565	0.243845
1	32299645	0.869514
1	32314974	0.18036
1	32330760	0.90492
1	32332528	0.90492
1	32349124	0.508753
1	32355399	0.626263
1	32371955	0.474788
1	32451543	0.189318
1	32539040	0.465515
1	32557801	0.173505
1	32586435	0.0730808
1	32596689	0.451949
1	32623276	0.165308
1	32632075	0.165308
1	32652707	0.250995
1	32663828	0.827232
1	32673525	0.250995
1	32682216	0.451949
1	32709549	0.451949
1	32743358	0.287752
1	32767654	0.018667
1	32781566	0.451949
1	32803872	0.018667
1	32822481	0.451949
1	32841825	0.451949
1	32854385	0.620085
1	32903322	0.489052
1	32922729	0.0544288
1	32941439	0.397661
1	32985311	0.489052
1	32989507	0.613969
1	33008517	0.489052
1	33012145	0.189318
1	33023977	0.397661
1	33050024	0.145791
1	33058991	0.145791
1	33076080	0.255939
1	33081176	0.397661
1	33098978	0.626263
1	33129077	0.451949
1	33169035	0.479495
1	33192141	0.479495
1	33211757	0.932436
1	33220296	0.980202
1	33232845	1
1	33240855	0.426013
1	33258419	0.878231
1	33263499	0.326788
1	33283578	0.802874
1	33286229	0.878231
1	33302868	0.726829
1	33316445	0.990051
1	33320471	0.895933
1	33349375	0.810911
1	33363562	0.810911
1	33371441	0.810911
1	33420845	0.613969
1	33427040	0.232176
1	33427525	0.305141
1	33458684	0.913999
1	33473653	0.305141
1	33499907	0.489052
1	33525053	0.489052
1	33536440	0.456426
1	33541435	0.413619
1	33561201	0.489052
1	33573842	0.556088
1	33584160	0.489052
1	33627072	0.763889
1	33633312	0.489052
1	33647392	0.498804
1	33667313	0.374893
1	33682751	0.498804
1	33691240	0.498804
1	33708179	0.498804
1	33758971	0.194909
1	33777244	0.451949
1	33899435	0.827232
1	33910155	0.90492
1	33920774	0.271371
1	33934398	0.712522
1	33943150	0.970454
1	33967724	0.556088
1	34000665	0.607915
1	34019296	0.941796
1	34024044	0.556088
1	34033003	0.756326
1	34128320	0.271371
1	34179477	0.638807
1	34194366	0.165308
1	34201200	0.0490438
1	34210123	0.165308
1	34230063	0.159035
1	34318339	0.479495
1	34339914	0.451949
1	34344589	0.451949
1	34360907	0.182116
1	34457383	0.698503
1	34464743	0.607915
1	34492659	0.651608
1	34492902	0.651608
1	34504825	0.794918
1	34516887	0.970454
1	34528934	0.980202
1	34544852	0.16058
1	34553147	0.16058
1	34563040	0.493904
1	34593994	0.330005
1	34599217	0.493904
1	34624402	0.539831
1	34644813	0.698503
1	34670242	0.296317
1	34681270	0.296317
1	34694257	0.556088
1	34707276	0.434486
1	34717853	0.970454
1	34726842	0.990051
1	34737241	0.539831
1	34756367	0.539831
1	34767815	0.524057
1	34770200	0.524057
1	34791753	0.802874
1	34826842	0.819031
1	34850464	0.990051
1	34869317	0.990051
1	34891109	0.371229
1	34891380	0.371229
1	34900842	0.305141
1	34907547	0.518904
1	34966808	0.860885
1	34991108	0.990051
1	35091653	0.779246
1	35129733	0.154489
1	35151070	0.386106
1	35171709	0.860885
1	35191688	0.157505
1	35198038	0.122572
1	35210282	0.539831
1	35238290	0.0380097
1	35256120	0.333255
1	35285783	0.556088
1	35289223	0.556088
1	35331933	0.163716
1	35335060	0.305141
1	35341311	0.163716
1	35346465	0.163716
1	35357732	0.305141
1	35368705	0.163716
1	35404845	0.951251
1	35413560	0.163716
1	35471528	0.163716
1	35502210	0.584299
1	35512088	0.0788754
1	35539632	0.0539153
1	35547072	0.0773842
1	35558155	0.887037
1	35574981	0.0773842
1	35613439	0.108176
1	35623282	0.108176
1	35647991	0.106119
1	35668117	0.131118
1	35687486	0.185682
1	35700671	0.131118
1	35713535	0.550614
1	35816804	0.371229
1	35834797	0.887037
1	35845243	0.529262
1	35897175	0.887037
1	35973968	0.0651593
1	35979359	0.131118
1	36001384	0.131118
1	36015964	0.131118
1	36040141	0.684764
1	36046767	0.0651593
1	36057840	0.684764
1	36068978	0.529262
1	36086036	0.0759218
1	36107137	0.16214
1	36120328	0.343201
1	36141360	0.0992283
1	36152678	0.0992283
1	36175608	0.0759218
1	36259655	0.102124
1	36280826	0.0759218
1	36288835	0.239059
1	36302644	0.243762
1	36313177	0.364011
1	36349594	0.371229
1	36356989	0.545195
1	36464061	0.0759218
1	36475826	0.53452
1	36487622	0.0759218
1	36495146	0.53452
1	36552056	0.0992283
1	36571665	0.0992283
1	36577840	0.53452
1	36588137	0.0258699
1	36633030	0.638807
1	36686369	0.763889
1	36692974	0.0418437
1	36714267	0.0759218
1	36745888	0.138925
1	36748302	0.763889
1	36772682	0.0651593
1	36804338	0.0651593
1	36809523	0.0651593
1	36850780	0.371229
1	36987391	0.489052
1	37016160	0.0651902
1	37051936	0.843888
1	37060353	0.0759218
1	37074927	0.0759218
1	37084581	0.932436
1	37093262	0.932436
1	37111000	0.0759218
1	37143848	0.771528
1	37157890	0.932436
1	37171191	0.157505
1	37186063	0.734091
1	37209352	0.498804
1	37349722	0.779246
1	37357318	0.106119
1	37439030	0.518904
1	37454560	0.878231
1	37462908	0.132388
1	37474433	0.279439
1	37515789	0.92317
1	37525538	0.92317
1	37531775	0.92317
1	37587673	0.578542
1	37615639	0.932436
1	37632961	0.970454
1	37644771	0.44313
1	37656324	0.802874
1	37670200	0.960804
1	37706400	0.470128
1	37718775	0.133669
1	37728977	0.895933
1	37749765	0.734091
1	37751913	0.895933
1	37752329	0.44313
1	37762452	0.447517
1	37799694	0.932436
1	37871289	0.110273
1	37939617	0.677998
1	37965500	0.677998
1	37967375	0.148634
1	37992275	0.456426
1	38006868	0.090308
1	38026141	0.219009
1	38073375	0.299229
1	38116542	0.282183
1	38131013	0.990051
1	38162699	0.970454
1	38175200	0.664669
1	38208660	0.0437849
1	38234881	0.632503
1	38442275	0.116817
1	38455153	0.819031
1	38495769	0.0509362
1	38537326	0.0509362
1	38549142	0.990051
1	38553609	0.176899
1	38572799	0.00549732
1	38580491	0.108176
1	38611089	0.748839
1	38614443	0.0284081
1	38661739	0.157505
1	38718658	0.000798906
1	38731288	0.284954
1	38744974	0.284954
1	38753478	0.430228
1	38796296	0.296317
1	38798778	0.771528
1	38855992	0.0433735
1	38867328	0.0256291
1	38940813	0.182116
1	39019232	0.524057
1	39034989	0.524057
1	39144161	0.524057
1	39212806	0.036605
1	39436500	0.584299
1	39474083	0.567202
1	39487227	0.0162404
1	39528587	0.0162404
1	39531470	0.835518
1	39545585	0.24856
1	39557561	0.24856
1	39577754	0.0992283
1	39605524	0.0992283
1	39613888	0.0992283
1	39672266	0.114593
1	39685927	0.129861
1	39695505	0.503753
1	39713726	0.503753
1	39731983	0.194909
1	39754745	0.0811672
1	39770137	0.529262
1	39773277	0.590114
1	39824437	0.374893
1	39867431	0.134964
1	39879732	0.250995
1	39894088	0.343201
1	39935130	0.0063014
1	39948185	0.193027
1	40042428	0.250995
1	40092516	0.474788
1	40095187	0.474788
1	40218550	0.0063014
1	40222485	0.0063014
1	40262132	0.227699
1	40289153	0.250995
1	40312487	0.90492
1	40375758	0.756326
1	40402799	0.756326
1	40429331	0.90492
1	40448794	0.712522
1	40466782	0.90492
1	40473447	0.712522
1	40619058	0.518904
1	40647049	0.0355862
1	40713297	0.632503
1	40716378	0.632503
1	40739067	0.970454
1	40757741	0.645175
1	40772545	0.258447
1	40798742	0.308142
1	40819739	0.92317
1	40838763	0.42184
1	40843435	0.221149
1	40858496	0.0242316
1	40864679	0.0398431
1	40912319	0.819031
1	40929393	0.178621
1	40929689	0.595988
1	40960518	0.132388
1	40965730	0.132388
1	40985929	0.550614
1	40988912	0.626263
1	41001012	0.698503
1	41012595	0.00181771
1	41024980	0.0242316
1	41025726	0.0242316
1	41043294	0.194909
1	41047007	0.0481246
1	41061592	0.645175
1	41072047	0.645175
1	41091223	0.052903
1	41118516	0.550614
1	41132083	0.430228
1	41149940	0.638807
1	41176954	0.19873
1	41204893	0.960804
1	41219000	0.0345963
1	41238484	0.00959798
1	41268643	0.0677191
1	41282712	0.00968653
1	41355100	0.645175
1	41372498	0.44313
1	41395435	0.835518
1	41427418	0.601921
1	41437571	0.705477
1	41452714	0.913999
1	41460853	0.705477
1	41472254	0.705477
1	41489540	0.0261129
1	41494077	0.0032531
1	41616586	0.389919
1	41621894	0.632503
1	41631720	0.271371
1	41670532	0.360455
1	41739556	0.35
1	41791523	0.941796
1	41805147	0.151533
1	41836825	0.0592804
1	41859013	0.645175
1	41873424	0.698503
1	41888057	0.645175
1	41906759	0.698503
1	41980365	0.819031
1	41988950	0.620085
1	42030177	0.913999
1	42035784	0.913999
1	42068781	0.219009
1	42089795	0.170177
1	42120518	0.787042
1	42130434	0.787042
1	42142381	0.787042
1	42184161	0.787042
1	42202091	0.787042
1	42269532	0.0278809
1	42303117	0.0278809
1	42372242	0.920526
1	42456784	0.35345
1	42489892	0.719639
1	42503775	0.719639
1	42518863	0.835518
1	42777170	0.835518
1	42822305	0.645175
1	42948311	0.0206787
1	43015924	0.0472229
1	43055297	0.0463385
1	43060183	0.0442004
1	43069750	0.0442004
1	43086310	0.140271
1	43087215	0.144391
1	43092953	0.651608
1	43106325	0.698503
1	43122055	0.601948
1	43127698	0.144391
1	43142392	0.645175
1	43153646	0.0744875
1	43166291	0.658106
1	43201740	0.0973446
1	43246603	0.869514
1	43268356	0.0633568
1	43327605	0.35345
1	43338121	0.35345
1	43419299	0.311173
1	43436707	0.0278809
1	43483518	0.140271
1	43484626	0.0633568
1	43559702	0.356935
1	43568771	0.451949
1	43589879	0.305141
1	43610924	0.35345
1	43626606	0.0162404
1	43659458	0.658106
1	43673107	0.151533
1	43698495	0.151533
1	43702986	0.698503
1	43752589	0.434486
1	43765623	0.148634
1	43827938	0.658106
1	43850199	0.0472229
1	43869454	0.794918
1	43891277	0.794918
1	43916910	0.279439
1	43921684	0.279439
1	43932834	0.0271087
1	43962747	0.279439
1	44001009	0.382331
1	44023136	0.664669
1	44030038	0.664669
1	44064755	0.178621
1	44072278	0.920526
1	44185258	0.794918
1	44192587	0.148634
1	44211458	0.148634
1	44247375	0.26354
1	44277098	0.189318
1	44287508	0.843888
1	44299415	0.296317
1	44303560	0.296317
1	44321806	0.296317
1	44324479	0.296317
1	44343507	0.787042
1	44372075	0.127384
1	44388746	0.0191951
1	44394819	0.0191951
1	44408219	0.127384
1	44432882	0.193027
1	44487350	0.206601
1	44499318	0.112412
1	44525105	0.734091
1	44541061	0.0803958
1	44586115	0.843888
1	44673898	0.434486
1	44712641	0.434486
1	44715916	0.843888
1	44781406	0.326788
1	44787049	0.664669
1	44814155	0.489052
1	44832668	0.489052
1	44851402	0.293434
1	44855282	0.293434
1	44904277	0.210656
1	44906424	0.210656
1	44908651	0.386106
1	44912596	0.756326
1	44951819	0.756326
1	44995146	0.389919
1	45003101	0.698503
1	45035513	0.698503
1	45072337	0.176899
1	45087544	0.274034
1	45112598	0.389919
1	45132081	0.658106
1	45141702	0.913999
1	45161186	0.698503
1	45162092	0.0843287
1	45167990	0.664669
1	45176736	0.632503
1	45205705	0.601921
1	45223659	0.470128
1	45257531	0.0349231
1	45275775	0.470128
1	45290075	0.470128
1	45310267	0.136271
1	45346631	0.35
1	45381667	0.810911
1	45446275	0.210656
1	45459146	0.24615
1	45462876	0.24615
1	45482819	0.748839
1	45520583	0.684764
1	45558807	0.19681
1	45580769	0.19681
1	45602659	0.0752012
1	45614451	0.913999
1	45615027	0.302171
1	45632904	0.913999
1	45643835	0.287752
1	45650346	0.364011
1	45674435	0.19681
1	45682515	0.756326
1	45697187	0.19681
1	45723238	0.426013
1	45727827	0.0326997
1	45789090	0.19681
1	45793086	0.19681
1	45830040	0.308142
1	45832105	0.308142
1	45872929	0.426013
1	45937985	0.193027
1	45959057	0.148634
1	46031590	0.127384
1	46037763	0.664669
1	46038938	0.664669
1	46074165	0.434486
1	46086930	0.48425
1	46100921	0.980202
1	46118733	0.529262
1	46179192	0.320448
1	46188174	0.0183232
1	46268586	0.479495
1	46279297	0.479495
1	46395672	0.409569
1	46412297	0.456426
1	46433734	0.409569
1	46461892	0.456426
1	46465737	0.456426
1	46479633	0.409569
1	46722472	0.456426
1	46808150	0.932436
1	46822629	1
1	46834761	0.386106
1	46866381	0.878231
1	46876460	0.620085
1	46916115	0.843888
1	46925052	0.878231
1	46955382	0.204604
1	47020821	0.470128
1	47039178	0.913999
1	47042731	0.887037
1	47051383	0.887037
1	47067653	0.887037
1	47089958	0.887037
1	47103280	0.887037
1	47121253	0.887037
1	47132429	0.578542
1	47146685	0.887037
1	47159194	0.887037
1	47180502	0.887037
1	47197325	0.677998
1	47212035	0.253455
1	47213176	0.253455
1	47216843	0.253455
1	47223951	0.726829
1	47239906	0.951251
1	47246454	0.677998
1	47250312	0.513803
1	47259547	0.253455
1	47289025	0.26354
1	47294869	0.852344
1	47305562	0.726829
1	47341521	0.677998
1	47381482	0.378593
1	47387605	0.378593
1	47418918	0.378593
1	47423152	0.132388
1	47459383	0.175193
1	47461617	0.409569
1	47466223	0.460948
1	47486252	0.460948
1	47497436	0.460948
1	47511153	0.951252
1	47540999	0.360455
1	47552665	0.658106
1	47564862	0.175193
1	47574567	0.42184
1	47579829	0.42184
1	47588613	0.132388
1	47598889	0.111337
1	47603334	0.111337
1	47623891	0.0609937
1	47635182	0.111337
1	47638607	0.417709
1	47657742	0.0609937
1	47662245	0.247793
1	47674846	0.951251
1	47701355	0.852344
1	47722811	0.92317
1	47733712	0.802874
1	47760684	0.187491
1	47771615	0.970454
1	47784375	0.970454
1	47790852	0.941796
1	47808551	0.970454
1	47816694	0.802874
1	47825515	0.970454
1	47834565	0.970454
1	47850894	0.360455
1	47857237	0.590114
1	47868314	0.194909
1	47890741	0.360455
1	47893348	0.360455
1	47906562	0.311173
1	47914032	0.360455
1	47925497	0.970454
1	47944564	0.941796
1	47955494	0.239059
1	47963521	0.239059
1	47972098	0.239059
1	47983112	0.239059
1	47994349	0.508753
1	47994591	0.508753
1	48000309	0.970454
1	48007784	0.951251
1	48018868	0.40556
1	48045476	0.572844
1	48048087	0.378593
1	48065207	0.951251
1	48079226	0.474788
1	48089694	0.474788
1	48104861	0.170177
1	48116553	0.170177
1	48137235	0.18036
1	48162645	0.42184
1	48175898	0.42184
1	48187562	0.42184
1	48203222	0.451949
1	48215759	0.584299
1	48224982	0.584299
1	48239545	0.810911
1	48250677	0.92317
1	48265265	0.460948
1	48274777	0.0109164
1	48285009	0.508753
1	48327528	0.26354
1	48331396	0.26354
1	48372986	0.317325
1	48380518	0.613969
1	48386241	0.317325
1	48417168	0.323602
1	48472588	0.802874
1	48479163	0.895933
1	48494407	0.326788
1	48589923	0.212713
1	48597127	0.852344
1	48604764	0.852344
1	48650264	0.367602
1	48662105	0.367602
1	48686363	0.990051
1	48733552	0.895933
1	48771714	0.990051
1	48779503	0.684764
1	48789525	0.0683668
1	48806779	0.0495101
1	48813349	0.0495101
1	48836083	0.311173
1	48858973	0.430228
1	48903097	0.276723
1	48917110	0.16214
1	48935114	0.16214
1	48942983	0.607915
1	48958274	0.53452
1	48961785	0.53452
1	48961954	0.53452
1	48977486	0.326788
1	48986351	0.356935
1	49007516	0.48425
1	49066955	0.645175
1	49079710	0.127384
1	49095904	0.397661
1	49096402	0.413619
1	49115560	0.253455
1	49130964	0.293434
1	49144416	0.343201
1	49144955	0.343201
1	49192824	0.0982819
1	49231556	1
1	49238226	0.590114
1	49244557	0.698503
1	49247452	0.364011
1	49260996	0.00294666
1	49280042	0.00294666
1	49288428	0.00294666
1	49292375	0.00294666
1	49308387	0.748839
1	49325350	0.0075634
1	49332370	0.0202972
1	49375431	0.208619
1	49426076	0.869514
1	49432068	0.0131269
1	49443054	0.658106
1	49473578	0.225494
1	49476380	0.225494
1	49526248	0.0992283
1	49547466	0.210656
1	49588960	0.397661
1	49616517	0.698503
1	49707722	0.0141343
1	49726148	0.129861
1	49730069	0.413619
1	49748468	0.208619
1	49754712	0.258447
1	49766307	0.159035
1	49788620	0.698503
1	49813277	0.321926
1	49831701	0.321926
1	49842290	0.852344
1	49845491	0.970454
1	49866540	0.243762
1	49874871	0.24615
1	49927154	0.0292179
1	49938509	0.113542
1	49989634	0.185682
1	50009545	0.185682
1	50038109	0.159035
1	50044617	0.0387325
1	50048163	0.258447
1	50068157	0.763889
1	50085320	0.447517
1	50086254	0.447517
1	50100871	0.447517
1	50110989	0.447517
1	50133644	0.447517
1	50170322	0.290579
1	50185145	0.913999
1	50194593	0.154489
1	50214767	0.0796319
1	50233925	0.234447
1	50250345	0.0592804
1	50269211	0.170177
1	50272515	0.131118
1	50289032	0.658106
1	50341601	0.290579
1	50362326	0.426013
1	50376434	0.336537
1	50394574	0.336537
1	50398687	0.895933
1	50415282	0.144391
1	50421093	0.00359205
1	50441139	0.154489
1	50447348	0.0127683
1	50456782	0.0592804
1	50468740	0.0592804
1	50477308	0.0592804
1	50514739	0.0127683
1	50590735	0.290579
1	50592295	0.175193
1	50629043	0.321926
1	50631122	0.321926
1	50647657	0.895933
1	50654295	0.321926
1	50679929	0.895933
1	50709080	0.0811672
1	50727654	0.523301
1	50744859	0.523301
1	50766645	0.556088
1	50778492	0.0690208
1	50794763	0.556088
1	50801975	0.556088
1	50816917	0.664669
1	50827732	0.255939
1	50839462	0.255939
1	50839564	0.255939
1	50839762	0.664669
1	50855144	0.698503
[truncated: 77,231 more rows]

## Sheet: Table S4
Table S4. List of SNPs on CFA13 showing complete Mendelian segregation with the hair length phenotype of Sapsarees
SNP Position	Genetic loci	Genotype frequency
		Long haired		Short haired
7331234	OXR1 intron	[A/G]	0.61	[G/G]	1
		[A/A]	0.38
		[A/C]	0.02
8635445	RSPO2 intron	[T/C]	0.57	[C/C]	1
		[T/T]	0.43
8635847	RSPO2 intron	[A/G]	0.56	[A/A]	1
		[G/G]	0.43
		[G/C]	0.02
8637613	RSPO2 intron	[T/C]	0.57	[C/C]	1
		[T/T]	0.43
8654384	RSPO2 intron	[T/C]	0.57	[C/C]	1
		[T/T]	0.43
9982484	PKHD1L1 exon30	[A/A]	0.51	[G/G]	1
		[A/G]	0.48
		[A/C]	0.02
10004937	PKHD1L1 intron	[A/A]	0.51	[G/G]	1
		[A/G]	0.48
		[A/C]	0.02
10027751	PKHD1L1 intron	[T/T]	0.51	[G/G]	1
		[T/G]	0.48
		[T/C]	0.02
10068749	PKHD1L1 intron	[G/G]	0.51	[A/A]	1
		[A/G]	0.48
		[G/C]	0.02

## Sheet: Table S5
Table S5. List of SNPs and linked genes associated with hair-length phenotype
Position on chromosome 13	Genetically Linked region (r2≥0.7)	Associated genes
8635445	8100646...8741966	ANGPT1, RSPO2, LOC111098519
8635847	8100646...8741966	ANGPT1, RSPO2, LOC111098519
8637613	8173824…8752297	ANGPT1, RSPO2, LOC111098519
8654384	8173824...8799885	ANGPT1, RSPO2, LOC111098519, LOC102154405

## Sheet: Table S6
Table S6. Estimated Tajima's D for the hair length phenotype-associated region of chromosome 13 (CFA13: 8,110,000–9,120,000 bp)
Region on chromosome 13 (bp)	TajimaD (Total breeds)	TajimaD (breed with insertion)
8110000 ~ 8120000	4.2481	0.117797
8120000 ~ 8130000	3.05051	0.15952
8130000 ~ 8140000	1.52975	-0.350318
8140000 ~ 8150000	0.884783	-0.228433
8150000 ~ 8160000	1.23345	0.0593915
8160000 ~ 8170000	1.24194	0.255929
8170000 ~ 8180000	2.56725	0.0659584
8180000 ~ 8190000	1.22395	-0.640101
8190000 ~ 8200000	-0.39119	-0.625894
8200000 ~ 8210000	1.9241	0.0798391
8210000 ~ 8220000	1.11779	-0.51988
8220000 ~ 8230000	1.04275	-0.807088
8230000 ~ 8240000	0.819066	-0.55553
8240000 ~ 8250000	1.43587	-0.625894
8250000 ~ 8260000	0.146524	-0.60174
8260000 ~ 8270000	1.4975	-0.5305
8270000 ~ 8280000	1.19494	-0.652113
8280000 ~ 8290000	0.757263	-0.783897
8290000 ~ 8300000	1.23864	-0.728132
8300000 ~ 8310000	0.937138	NA
8310000 ~ 8320000	1.39663	-0.977045
8320000 ~ 8330000	3.10068	-0.810138
8330000 ~ 8340000	2.90354	-0.687802
8340000 ~ 8350000	2.14533	-1.13598
8350000 ~ 8360000	2.41323	-1.03085
8360000 ~ 8370000	2.76778	-1.01122
8370000 ~ 8380000	2.2824	-1.05878
8380000 ~ 8390000	2.3845	-0.950432
8390000 ~ 8400000	3.05501	-0.970765
8400000 ~ 8410000	3.18062	-1.07918
8410000 ~ 8420000	2.19793	-0.97905
8420000 ~ 8430000	2.3422	-1.13906
8430000 ~ 8440000	2.03615	-1.04896
8440000 ~ 8450000	3.02249	-1.23706
8450000 ~ 8460000	2.60965	-1.14932
8460000 ~ 8470000	2.16483	-0.887536
8470000 ~ 8480000	2.93703	-1.33309
8480000 ~ 8490000	1.16791	-1.02058
8490000 ~ 8500000	1.78888	-0.50379
8500000 ~ 8510000	2.0208	NA
8510000 ~ 8520000	2.72719	-0.60174
8520000 ~ 8530000	1.50759	-1.35939
8530000 ~ 8540000	1.57204	-2.22497
8540000 ~ 8550000	1.32936	-1.76129
8550000 ~ 8560000	1.02115	-2.36968
8560000 ~ 8570000	1.03853	-2.40279
8570000 ~ 8580000	3.5025	-2.50039
8580000 ~ 8590000	3.10093	-2.49353
8590000 ~ 8600000	2.26909	-1.59045
8600000 ~ 8610000	1.06252	-0.174764
8610000 ~ 8620000	2.48558	-0.327132
8620000 ~ 8630000	2.2685	NA
8630000 ~ 8640000	1.54838	-2.22052
8640000 ~ 8650000	1.82281	-1.36168
8650000 ~ 8660000	3.10967	-1.01524
8660000 ~ 8670000	3.11794	NA
8670000 ~ 8680000	-0.1385	NA
8680000 ~ 8690000	0.912567	-1.35642
8690000 ~ 8700000	4.58523	-2.61907
8700000 ~ 8710000	3.09157	0.920632
8710000 ~ 8720000	3.08845	0.486909
8720000 ~ 8730000	1.97442	-0.276272
8730000 ~ 8740000	1.20295	-1.08223
8740000 ~ 8750000	0.226814	-0.117923
8750000 ~ 8760000	2.00774	0.614675
8760000 ~ 8770000	2.21533	-0.57415
8770000 ~ 8780000	1.38825	-1.70076
8780000 ~ 8790000	1.35572	-1.25068
8790000 ~ 8800000	2.60964	0.0854673
8800000 ~ 8810000	3.52992	0.29902
8810000 ~ 8820000	0.693739	0.564811
8820000 ~ 8830000	-0.332648	0.910787
8830000 ~ 8840000	-1.12971	-0.357141
8840000 ~ 8850000	-0.316695	-0.348351
8850000 ~ 8860000	-0.873508	-0.640473
8860000 ~ 8870000	-0.538482	0.772504
8870000 ~ 8880000	-0.729792	-0.586296
8880000 ~ 8890000	0.383415	0.500472
8890000 ~ 8900000	0.0341748	0.135074
8900000 ~ 8910000	2.09966	0.627153
8910000 ~ 8920000	0.571647	0.526226
8920000 ~ 8930000	1.47611	0.849352
8930000 ~ 8940000	0.415693	-0.4864
8940000 ~ 8950000	0.0282864	-1.01524
8950000 ~ 8960000	0.0962785	NA
8960000 ~ 8970000	-0.486131	-1.01524
8970000 ~ 8980000	-0.289098	NA
8980000 ~ 8990000	0.314365	0.0240779
8990000 ~ 9000000	-0.294349	0.188199
9000000 ~ 9010000	1.23872	-1.04904
9010000 ~ 9020000	2.22346	-2.66147
9020000 ~ 9030000	2.31536	-2.40476
9030000 ~ 9040000	1.95926	-2.63193
9040000 ~ 9050000	2.38274	-2.51586
9050000 ~ 9060000	1.98988	-2.26625
9060000 ~ 9070000	2.58543	-0.261594
9070000 ~ 9080000	2.53172	1.6185
9080000 ~ 9090000	2.52622	1.94434
9090000 ~ 9100000	2.57368	2.05512
9100000 ~ 9110000	2.8515	1.89354
9110000 ~ 9120000	1.37679	1.30844
*NA: Tajima's D is unable to calculate because of no SNP at that location.

## Sheet: Table S7
Table S7. Allelic distribution of SNPs in the RSPO2-linked region of 56 dogs
SNP Position on chromosome 13	Number of alleles	Number of infomative alleles	Allele 1 frequency	Allele 2 frequency
8110522	2	112	0.116071	0.883929
8110999	2	88	0.125	0.875
8111227	2	112	0.116071	0.883929
8111236	2	112	0.116071	0.883929
8111994	2	112	0.892857	0.107143
8113007	2	112	0.107143	0.892857
8113010	2	108	0.111111	0.888889
8113057	2	112	0.107143	0.892857
8113338	2	112	0.892857	0.107143
8115244	2	112	0.892857	0.107143
8115275	2	112	0.107143	0.892857
8115484	2	112	0.107143	0.892857
8115870	2	112	0.892857	0.107143
8115932	2	112	0.892857	0.107143
8117040	2	112	0.892857	0.107143
8117966	2	112	0.892857	0.107143
8117971	2	112	0.892857	0.107143
8117994	2	112	0.892857	0.107143
8118448	2	110	0.890909	0.109091
8118869	2	110	0.890909	0.109091
8118908	2	110	0.890909	0.109091
8119225	2	112	0.107143	0.892857
8119264	2	112	0.107143	0.892857
8119610	2	112	0.107143	0.892857
8120620	2	110	0.890909	0.109091
8121445	2	110	0.890909	0.109091
8122038	2	112	0.107143	0.892857
8122264	2	112	0.892857	0.107143
8122624	2	112	0.107143	0.892857
8122975	2	86	0.139535	0.860465
8123311	2	112	0.892857	0.107143
8125438	2	112	0.892857	0.107143
8126394	2	108	0.888889	0.111111
8128275	2	112	0.116071	0.883929
8128651	2	112	0.107143	0.892857
8129938	2	112	0.116071	0.883929
8130096	2	112	0.892857	0.107143
8130522	2	112	0.107143	0.892857
8130673	2	110	0.1	0.9
8131081	2	110	0.109091	0.890909
8131723	2	110	0.954545	0.0454545
8132746	2	112	0.107143	0.892857
8132899	2	112	0.892857	0.107143
8133791	2	112	0.107143	0.892857
8134123	2	110	0.109091	0.890909
8134626	2	62	0.951613	0.0483871
8135405	2	112	0.946429	0.0535714
8135452	2	110	0.890909	0.109091
8135653	2	110	0.954545	0.0454545
8139397	2	110	0.890909	0.109091
8141693	2	110	0.954545	0.0454545
8141969	2	110	0.109091	0.890909
8142071	2	110	0.954545	0.0454545
8142377	2	112	0.107143	0.892857
8142758	2	112	0.107143	0.892857
8143739	2	112	0.892857	0.107143
8144858	2	110	0.109091	0.890909
8145964	2	112	0.839286	0.160714
8146805	2	110	0.890909	0.109091
8147850	2	112	0.107143	0.892857
8149844	2	112	0.955357	0.0446429
8151972	2	112	0.107143	0.892857
8152273	2	112	0.107143	0.892857
8153300	2	110	0.109091	0.890909
8155122	2	112	0.107143	0.892857
8155892	2	110	0.890909	0.109091
8159222	2	112	0.107143	0.892857
8160412	2	110	0.109091	0.890909
8160688	2	108	0.888889	0.111111
8163346	2	112	0.107143	0.892857
8163584	2	28	0.821429	0.178571
8164270	2	112	0.107143	0.892857
8164472	2	112	0.107143	0.892857
8164944	2	108	0.888889	0.111111
8170352	2	112	0.107143	0.892857
8170619	2	112	0.892857	0.107143
8171190	2	112	0.892857	0.107143
8172224	2	112	0.892857	0.107143
8172720	2	112	0.107143	0.892857
8172919	2	110	0.109091	0.890909
8173824	2	108	0.111111	0.888889
8178483	2	112	0.107143	0.892857
8181317	2	112	0.955357	0.0446429
8181430	2	104	0.115385	0.884615
8184929	2	110	0.890909	0.109091
8185061	2	110	0.1	0.9
8185372	2	110	0.1	0.9
8185555	2	112	0.991071	0.00892857
8187523	2	112	0.955357	0.0446429
8194438	2	112	0.107143	0.892857
8198051	2	112	0.955357	0.0446429
8198587	2	112	0.955357	0.0446429
8200350	2	112	0.107143	0.892857
8202040	2	112	0.107143	0.892857
8206436	2	112	0.107143	0.892857
8207929	2	106	0.113208	0.886792
8208282	2	108	0.111111	0.888889
8214281	2	112	0.107143	0.892857
8216705	2	110	0.0636364	0.936364
8218251	2	112	0.955357	0.0446429
8221294	2	110	0.954545	0.0454545
8222139	2	102	0.970588	0.0294118
8224748	2	112	0.107143	0.892857
8227023	2	110	0.945455	0.0545455
8232470	2	112	0.9375	0.0625
8234772	2	104	0.951923	0.0480769
8236556	2	112	0.107143	0.892857
8237308	2	106	0.113208	0.886792
8237741	2	110	0.954545	0.0454545
8242728	2	112	0.955357	0.0446429
8245811	2	112	0.955357	0.0446429
8248165	2	112	0.107143	0.892857
8250676	2	110	0.954545	0.0454545
8262994	2	110	0.0636364	0.936364
8263735	2	112	0.0625	0.9375
8266067	2	112	0.0625	0.9375
8268753	2	112	0.107143	0.892857
8271004	2	112	0.0625	0.9375
8272254	2	112	0.0625	0.9375
8278286	2	110	0.0636364	0.936364
8280053	2	110	0.0636364	0.936364
8280990	2	92	0.923913	0.076087
8280992	2	94	0.946809	0.0531915
8287498	2	110	0.954545	0.0454545
8292882	2	112	0.0625	0.9375
8293875	2	112	0.0625	0.9375
8296324	2	112	0.0625	0.9375
8296455	2	112	0.0625	0.9375
8310311	2	110	0.954545	0.0454545
8311080	2	112	0.0625	0.9375
8313544	2	112	0.0625	0.9375
8315768	2	110	0.0636364	0.936364
8316006	2	112	0.0625	0.9375
8316217	2	112	0.0625	0.9375
8318167	2	112	0.0625	0.9375
8318335	2	112	0.0625	0.9375
8318356	2	110	0.0636364	0.936364
8318550	2	112	0.0625	0.9375
8320042	2	110	0.0545455	0.945455
8321225	2	110	0.0636364	0.936364
8321848	2	94	0.0638298	0.93617
8322130	2	110	0.0636364	0.936364
8322551	2	112	0.0625	0.9375
8322833	2	112	0.0535714	0.946429
8324181	2	42	0.0238095	0.97619
8324234	2	104	0.0673077	0.932692
8324640	2	12	0.166667	0.833333
8327807	2	110	0.0636364	0.936364
8330371	2	110	0.0636364	0.936364
8331182	2	22	0.272727	0.727273
8331580	2	62	0.0967742	0.903226
8331609	2	98	0.989796	0.0102041
8331696	2	110	0.0636364	0.936364
8331878	2	112	0.0625	0.9375
8331987	2	112	0.0625	0.9375
8335771	2	112	0.0625	0.9375
8336366	2	108	0.0648148	0.935185
8337461	2	112	0.0625	0.9375
8338570	2	112	0.0625	0.9375
8339883	2	112	0.0625	0.9375
8341481	2	112	0.0625	0.9375
8342347	2	112	0.0625	0.9375
8343053	2	110	0.954545	0.0454545
8343083	2	112	0.0625	0.9375
8343396	2	112	0.0625	0.9375
8344994	2	108	0.0462963	0.953704
8347071	2	112	0.0625	0.9375
8347716	2	112	0.0625	0.9375
8348074	2	108	0.981481	0.0185185
8348969	2	112	0.0625	0.9375
8349393	2	110	0.0636364	0.936364
8350577	2	112	0.0625	0.9375
8350747	2	112	0.0625	0.9375
8350915	2	112	0.0625	0.9375
8351181	2	110	0.0636364	0.936364
8352460	2	112	0.0625	0.9375
8352687	2	112	0.0625	0.9375
8352883	2	110	0.0636364	0.936364
8353331	2	112	0.0625	0.9375
8354769	2	112	0.0625	0.9375
8356014	2	110	0.0636364	0.936364
8356635	2	110	0.0636364	0.936364
8357088	2	112	0.0625	0.9375
8357405	2	112	0.955357	0.0446429
8358061	2	110	0.0636364	0.936364
8359974	2	112	0.0625	0.9375
8360245	2	112	0.0625	0.9375
8360318	2	112	0.0625	0.9375
8361149	2	112	0.0625	0.9375
8361421	2	110	0.0636364	0.936364
8361551	2	110	0.0636364	0.936364
8362016	2	112	0.0625	0.9375
8362685	2	112	0.0625	0.9375
8363252	2	112	0.0625	0.9375
8363286	2	112	0.0625	0.9375
8363997	2	112	0.0625	0.9375
8364915	2	112	0.0625	0.9375
8366660	2	110	0.0636364	0.936364
8367176	2	110	0.0636364	0.936364
8367267	2	112	0.0625	0.9375
8367678	2	112	0.0625	0.9375
8372181	2	112	0.955357	0.0446429
8372458	2	112	0.0625	0.9375
8373290	2	110	0.0636364	0.936364
8373486	2	112	0.0625	0.9375
8373599	2	110	0.0636364	0.936364
8376478	2	112	0.955357	0.0446429
8376806	2	112	0.0625	0.9375
8376941	2	112	0.0625	0.9375
8377060	2	112	0.0625	0.9375
8377328	2	112	0.0625	0.9375
8377563	2	112	0.0625	0.9375
8377627	2	102	0.0686275	0.931373
8378536	2	110	0.0636364	0.936364
8378786	2	110	0.0636364	0.936364
8381008	2	112	0.0625	0.9375
8381538	2	112	0.0625	0.9375
8382800	2	112	0.0625	0.9375
8382980	2	106	0.0660377	0.933962
8383902	2	112	0.0625	0.9375
8384855	2	112	0.0625	0.9375
8384884	2	106	0.0660377	0.933962
8385121	2	108	0.0648148	0.935185
8385163	2	108	0.0648148	0.935185
8386285	2	112	0.0625	0.9375
8386860	2	112	0.0625	0.9375
8387476	2	112	0.0625	0.9375
8388436	2	112	0.0625	0.9375
8390085	2	112	0.107143	0.892857
8390353	2	112	0.0625	0.9375
8390536	2	112	0.0625	0.9375
8391652	2	112	0.0625	0.9375
8391846	2	112	0.0625	0.9375
8393723	2	112	0.0625	0.9375
8393775	2	110	0.0636364	0.936364
8394117	2	112	0.0625	0.9375
8395533	2	110	0.0636364	0.936364
8395560	2	112	0.0625	0.9375
8396190	2	112	0.0625	0.9375
8396873	2	112	0.0625	0.9375
8397029	2	108	0.0648148	0.935185
8397173	2	112	0.0625	0.9375
8397869	2	112	0.0625	0.9375
8398028	2	112	0.0625	0.9375
8399501	2	112	0.0625	0.9375
8400651	2	108	0.0648148	0.935185
8400664	2	112	0.0625	0.9375
8401561	2	110	0.0636364	0.936364
8402714	2	112	0.0625	0.9375
8403175	2	110	0.0636364	0.936364
8405109	2	112	0.0625	0.9375
8405357	2	112	0.0625	0.9375
8405803	2	110	0.0454545	0.954545
8405883	2	110	0.0545455	0.945455
8406529	2	112	0.0625	0.9375
8406563	2	112	0.0625	0.9375
8407073	2	112	0.0625	0.9375
8408196	2	110	0.0636364	0.936364
8408234	2	110	0.0636364	0.936364
8408277	2	112	0.0625	0.9375
8408757	2	60	0.0833333	0.916667
8409154	2	104	0.0673077	0.932692
8409837	2	112	0.0625	0.9375
8410512	2	112	0.0625	0.9375
8411153	2	108	0.0648148	0.935185
8411817	2	106	0.0660377	0.933962
8412057	2	112	0.0625	0.9375
8412362	2	112	0.0625	0.9375
8412890	2	112	0.0625	0.9375
8414649	2	110	0.0636364	0.936364
8415062	2	112	0.0625	0.9375
8415437	2	112	0.0625	0.9375
8416674	2	110	0.0636364	0.936364
8416719	2	112	0.0625	0.9375
8417688	2	112	0.0714286	0.928571
8417749	2	112	0.0535714	0.946429
8418632	2	110	0.0545455	0.945455
8419200	2	112	0.0625	0.9375
8419751	2	112	0.0625	0.9375
8420306	2	112	0.0625	0.9375
8421137	2	112	0.0803571	0.919643
8421587	2	112	0.0625	0.9375
8421666	2	112	0.0625	0.9375
8421830	2	112	0.0625	0.9375
8422013	2	112	0.0625	0.9375
8422155	2	94	0.0744681	0.925532
8422588	2	78	0.987179	0.0128205
8423889	2	24	0.916667	0.0833333
8424846	2	62	0.870968	0.129032
8425218	2	64	0.9375	0.0625
8425345	2	62	0.967742	0.0322581
8425366	2	80	0.975	0.025
8425370	2	54	0.925926	0.0740741
8425478	2	88	0.943182	0.0568182
8425632	2	90	0.933333	0.0666667
8425717	2	94	0.0638298	0.93617
8425873	2	100	0.06	0.94
8425878	2	112	0.0535714	0.946429
8425932	2	112	0.946429	0.0535714
8426013	2	112	0.946429	0.0535714
8426575	2	110	0.0363636	0.963636
8427584	2	110	0.0545455	0.945455
8427687	2	104	0.0576923	0.942308
8433395	2	112	0.0535714	0.946429
8433919	2	112	0.0535714	0.946429
8435005	2	108	0.0555556	0.944444
8439297	2	112	0.0535714	0.946429
8439627	2	112	0.0535714	0.946429
8439864	2	112	0.0535714	0.946429
8440176	2	112	0.0535714	0.946429
8440332	2	112	0.0535714	0.946429
8440673	2	112	0.946429	0.0535714
8440955	2	112	0.0535714	0.946429
8441195	2	110	0.0545455	0.945455
8441258	2	110	0.945455	0.0545455
8441890	2	110	0.0545455	0.945455
8442045	2	110	0.0545455	0.945455
8442632	2	112	0.946429	0.0535714
8442918	2	108	0.0555556	0.944444
8444803	2	108	0.944444	0.0555556
8445058	2	112	0.0535714	0.946429
8445661	2	112	0.0535714	0.946429
8446436	2	110	0.945455	0.0545455
8449624	2	110	0.945455	0.0545455
8451450	2	112	0.946429	0.0535714
8453224	2	112	0.9375	0.0625
8453847	2	112	0.946429	0.0535714
8454634	2	112	0.0535714	0.946429
8455024	2	112	0.946429	0.0535714
8455347	2	112	0.0535714	0.946429
8456357	2	112	0.0535714	0.946429
8456617	2	108	0.0555556	0.944444
8457697	2	112	0.0535714	0.946429
8458807	2	112	0.0535714	0.946429
8459173	2	112	0.0535714	0.946429
8465182	2	110	0.945455	0.0545455
8465658	2	108	0.944444	0.0555556
8467070	2	112	0.0535714	0.946429
8469117	2	110	0.945455	0.0545455
8470864	2	108	0.953704	0.0462963
8472061	2	112	0.0535714	0.946429
8472576	2	110	0.945455	0.0545455
8472798	2	110	0.0545455	0.945455
8473272	2	112	0.946429	0.0535714
8473402	2	112	0.0535714	0.946429
8473622	2	112	0.946429	0.0535714
8473716	2	112	0.0535714	0.946429
8473786	2	110	0.0545455	0.945455
8474034	2	112	0.0535714	0.946429
8474472	2	112	0.0535714	0.946429
8474551	2	112	0.946429	0.0535714
8475112	2	112	0.946429	0.0535714
8475698	2	110	0.945455	0.0545455
8476952	2	110	0.945455	0.0545455
8477210	2	112	0.0535714	0.946429
8477315	2	112	0.0535714	0.946429
8477839	2	112	0.0535714	0.946429
8477953	2	112	0.946429	0.0535714
8478449	2	110	0.0545455	0.945455
8478462	2	112	0.0535714	0.946429
8479314	2	110	0.963636	0.0363636
8479984	2	108	0.944444	0.0555556
8481335	2	112	0.946429	0.0535714
8481703	2	112	0.0535714	0.946429
8481954	2	110	0.0545455	0.945455
8483374	2	110	0.954545	0.0454545
8486412	2	112	0.991071	0.00892857
8491477	2	106	0.990566	0.00943396
8513130	2	110	0.990909	0.00909091
8523371	2	110	0.990909	0.00909091
8523731	2	40	0.85	0.15
8523842	2	112	0.991071	0.00892857
8525773	2	112	0.00892857	0.991071
8529028	2	112	0.991071	0.00892857
8530000	2	112	0.00892857	0.991071
8530074	2	110	0.00909091	0.990909
8531217	2	108	0.990741	0.00925926
8531694	2	106	0.990566	0.00943396
8532163	2	110	0.00909091	0.990909
8537317	2	20	0.95	0.05
8537324	2	108	0.990741	0.00925926
8537740	2	112	0.991071	0.00892857
8538414	2	112	0.00892857	0.991071
8539477	2	112	0.00892857	0.991071
8542327	2	112	0.991071	0.00892857
8543084	2	112	0.991071	0.00892857
8548085	2	108	0.990741	0.00925926
8548284	2	112	0.991071	0.00892857
8549595	2	112	0.991071	0.00892857
8550635	2	110	0.990909	0.00909091
8551169	2	110	0.00909091	0.990909
8552140	2	112	0.991071	0.00892857
8552529	2	108	0.990741	0.00925926
8552740	2	80	0.9875	0.0125
8552959	2	56	0.982143	0.0178571
8552980	2	112	0.00892857	0.991071
8553550	2	98	0.0102041	0.989796
8557257	2	92	0.98913	0.0108696
8557306	2	112	0.991071	0.00892857
8557881	2	112	0.00892857	0.991071
8558710	2	112	0.00892857	0.991071
8558716	2	110	0.990909	0.00909091
8560672	2	112	0.991071	0.00892857
8561808	2	110	0.990909	0.00909091
8561987	2	110	0.990909	0.00909091
8562428	2	106	0.990566	0.00943396
8562670	2	110	0.990909	0.00909091
8562928	2	112	0.991071	0.00892857
8565093	2	112	0.991071	0.00892857
8565636	2	112	0.991071	0.00892857
8566447	2	112	0.991071	0.00892857
8567024	2	112	0.00892857	0.991071
8567283	2	112	0.00892857	0.991071
8567830	2	112	0.991071	0.00892857
8569587	2	112	0.991071	0.00892857
8570230	2	112	0.991071	0.00892857
8570760	2	112	0.991071	0.00892857
8570886	2	112	0.00892857	0.991071
8571345	2	112	0.991071	0.00892857
8571865	2	28	0.857143	0.142857
8572009	2	112	0.00892857	0.991071
8572501	2	112	0.991071	0.00892857
8572607	2	110	0.990909	0.00909091
8573036	2	110	0.00909091	0.990909
8573308	2	106	0.990566	0.00943396
8573991	2	112	0.00892857	0.991071
8575058	2	112	0.991071	0.00892857
8575514	2	106	0.990566	0.00943396
8577357	2	112	0.991071	0.00892857
8577655	2	112	0.991071	0.00892857
8577850	2	112	0.991071	0.00892857
8578101	2	112	0.00892857	0.991071
8578416	2	112	0.00892857	0.991071
8578717	2	112	0.991071	0.00892857
8578744	2	112	0.991071	0.00892857
8579213	2	112	0.991071	0.00892857
8579381	2	110	0.990909	0.00909091
8579805	2	112	0.991071	0.00892857
8579849	2	112	0.991071	0.00892857
8579850	2	110	0.990909	0.00909091
8580091	2	110	0.990909	0.00909091
8580340	2	112	0.991071	0.00892857
8580359	2	112	0.991071	0.00892857
8580772	2	112	0.991071	0.00892857
8580786	2	110	0.990909	0.00909091
8581925	2	112	0.991071	0.00892857
8581929	2	110	0.990909	0.00909091
8581973	2	112	0.991071	0.00892857
8582010	2	112	0.00892857	0.991071
8582115	2	112	0.00892857	0.991071
8585860	2	100	0.99	0.01
8588050	2	112	0.00892857	0.991071
8588259	2	110	0.990909	0.00909091
8588769	2	110	0.00909091	0.990909
8588849	2	50	0.98	0.02
8588923	2	10	0.8	0.2
8589868	2	32	0.90625	0.09375
8591281	2	36	0.916667	0.0833333
8592010	2	14	0.0714286	0.928571
8592356	2	112	0.00892857	0.991071
8600263	2	112	0.991071	0.00892857
8607649	2	112	0.991071	0.00892857
8608609	2	112	0.991071	0.00892857
8608931	2	112	0.991071	0.00892857
8608932	2	110	0.990909	0.00909091
8619093	2	108	0.990741	0.00925926
8635445	2	110	0.990909	0.00909091
8635847	2	110	0.990909	0.00909091
8636409	2	112	0.991071	0.00892857
8637335	2	110	0.990909	0.00909091
8637431	2	112	0.00892857	0.991071
8637559	2	112	0.00892857	0.991071
8637613	2	110	0.963636	0.0363636
8638033	2	112	0.964286	0.0357143
8639020	2	110	0.963636	0.0363636
8641658	2	102	0.960784	0.0392157
8641900	2	104	0.990385	0.00961538
8652505	2	112	0.00892857	0.991071
8673838	2	112	0.00892857	0.991071
8680459	2	112	0.991071	0.00892857
8687683	2	112	0.00892857	0.991071
8688146	2	112	0.00892857	0.991071
8688874	2	112	0.00892857	0.991071
8691437	2	94	0.0106383	0.989362
8691868	2	100	0.01	0.99
8693845	2	112	0.00892857	0.991071
8694052	2	110	0.00909091	0.990909
8694293	2	112	0.00892857	0.991071
8694306	2	112	0.00892857	0.991071
8694401	2	112	0.0446429	0.955357
8694424	2	112	0.00892857	0.991071
8695175	2	112	0.00892857	0.991071
8695188	2	112	0.00892857	0.991071
8695333	2	112	0.00892857	0.991071
8696157	2	112	0.00892857	0.991071
8696239	2	112	0.00892857	0.991071
8696411	2	78	0.0128205	0.987179
8696614	2	112	0.00892857	0.991071
8696675	2	112	0.00892857	0.991071
8697154	2	112	0.00892857	0.991071
8697322	2	108	0.00925926	0.990741
8697341	2	110	0.00909091	0.990909
8697383	2	112	0.00892857	0.991071
8697409	2	108	0.157407	0.842593
8697984	2	110	0.154545	0.845455
8698157	2	110	0.136364	0.863636
8698174	2	108	0.157407	0.842593
8698526	2	24	0.5	0.5
8698849	2	110	0.136364	0.863636
8699191	2	110	0.136364	0.863636
8699521	2	112	0.151786	0.848214
8700051	2	112	0.151786	0.848214
8700065	2	112	0.151786	0.848214
8701371	2	110	0.845455	0.154545
8701547	2	112	0.955357	0.0446429
8702515	2	112	0.196429	0.803571
8702815	2	112	0.955357	0.0446429
8703653	2	18	0.611111	0.388889
8706438	2	112	0.955357	0.0446429
8706546	2	110	0.954545	0.0454545
8706768	2	112	0.803571	0.196429
8708262	2	112	0.955357	0.0446429
8709098	2	64	0.953125	0.046875
8709192	2	76	0.973684	0.0263158
8709677	2	108	0.953704	0.0462963
8709771	2	112	0.803571	0.196429
8710230	2	110	0.8	0.2
8710684	2	110	0.818182	0.181818
8710988	2	112	0.803571	0.196429
8711907	2	110	0.809091	0.190909
8712196	2	108	0.824074	0.175926
8712834	2	112	0.803571	0.196429
8712836	2	112	0.955357	0.0446429
8712868	2	110	0.863636	0.136364
8713213	2	110	0.954545	0.0454545
8713796	2	100	0.18	0.82
8713963	2	108	0.796296	0.203704
8714660	2	108	0.861111	0.138889
8715430	2	106	0.858491	0.141509
8715906	2	112	0.955357	0.0446429
8718212	2	108	0.953704	0.0462963
8718541	2	108	0.842593	0.157407
8720317	2	104	0.836538	0.163462
8720970	2	106	0.95283	0.0471698
8722173	2	106	0.95283	0.0471698
8722211	2	110	0.990909	0.00909091
8723764	2	104	0.990385	0.00961538
8723807	2	32	0.9375	0.0625
8724253	2	112	0.955357	0.0446429
8725193	2	110	0.954545	0.0454545
8725649	2	112	0.955357	0.0446429
8725958	2	110	0.954545	0.0454545
8728018	2	112	0.955357	0.0446429
8728206	2	112	0.955357	0.0446429
8729000	2	42	0.97619	0.0238095
8729212	2	108	0.814815	0.185185
8729431	2	112	0.946429	0.0535714
8730530	2	102	0.95098	0.0490196
8731779	2	102	0.196078	0.803922
8731825	2	106	0.0471698	0.95283
8732154	2	110	0.963636	0.0363636
8732289	2	112	0.955357	0.0446429
8732423	2	112	0.0446429	0.955357
8732431	2	112	0.955357	0.0446429
8732701	2	112	0.857143	0.142857
8734156	2	112	0.848214	0.151786
8734204	2	108	0.953704	0.0462963
8734910	2	110	0.854545	0.145455
8736532	2	108	0.953704	0.0462963
8736579	2	110	0.863636	0.136364
8737184	2	110	0.845455	0.154545
8738899	2	40	0.95	0.05
8739184	2	106	0.830189	0.169811
8740894	2	106	0.877358	0.122642
8742789	2	112	0.803571	0.196429
8743317	2	110	0.8	0.2
8744582	2	110	0.8	0.2
8745312	2	106	0.95283	0.0471698
8748065	2	102	0.852941	0.147059
8748861	2	102	0.852941	0.147059
8749676	2	106	0.773585	0.226415
8749762	2	100	0.97	0.03
8749968	2	78	0.230769	0.769231
8750957	2	92	0.0543478	0.945652
8750958	2	50	0.86	0.14
8751394	2	92	0.228261	0.771739
8752297	2	56	0.910714	0.0892857
8752534	2	110	0.945455	0.0545455
8753050	2	112	0.901786	0.0982143
8753318	2	110	0.9	0.1
8753321	2	112	0.901786	0.0982143
8753374	2	110	0.854545	0.145455
8753700	2	106	0.830189	0.169811
8754372	2	112	0.964286	0.0357143
8754770	2	112	0.8125	0.1875
8755264	2	112	0.991071	0.00892857
8755545	2	108	0.953704	0.0462963
8755821	2	110	0.990909	0.00909091
8756400	2	108	0.833333	0.166667
8756915	2	110	0.836364	0.163636
8757032	2	112	0.964286	0.0357143
8757084	2	112	0.964286	0.0357143
8758800	2	112	0.991071	0.00892857
8760722	2	110	0.827273	0.172727
8761432	2	112	0.8125	0.1875
8761737	2	112	0.964286	0.0357143
8761846	2	112	0.964286	0.0357143
8763962	2	112	0.964286	0.0357143
8764048	2	110	0.809091	0.190909
8764413	2	110	0.827273	0.172727
8764666	2	112	0.991071	0.00892857
8765000	2	60	0.616667	0.383333
8765272	2	112	0.991071	0.00892857
8765432	2	112	0.991071	0.00892857
8765453	2	108	0.972222	0.0277778
8765696	2	110	0.990909	0.00909091
8766072	2	112	0.964286	0.0357143
8766299	2	112	0.991071	0.00892857
8766563	2	110	0.990909	0.00909091
8766793	2	112	0.991071	0.00892857
8767302	2	112	0.955357	0.0446429
8767361	2	112	0.964286	0.0357143
8767811	2	112	0.964286	0.0357143
8767979	2	110	0.990909	0.00909091
8768344	2	110	0.954545	0.0454545
8769564	2	110	0.954545	0.0454545
8770336	2	112	0.964286	0.0357143
8771514	2	110	0.963636	0.0363636
8772145	2	110	0.963636	0.0363636
8772498	2	112	0.821429	0.178571
8772706	2	112	0.991071	0.00892857
8773698	2	112	0.964286	0.0357143
8773923	2	112	0.964286	0.0357143
8774046	2	112	0.964286	0.0357143
8774364	2	110	0.963636	0.0363636
8775189	2	110	0.818182	0.181818
8775332	2	110	0.963636	0.0363636
8777293	2	108	0.962963	0.037037
8777800	2	106	0.962264	0.0377358
8778013	2	112	0.964286	0.0357143
8779563	2	112	0.964286	0.0357143
8780211	2	112	0.964286	0.0357143
8780635	2	108	0.962963	0.037037
8780636	2	110	0.963636	0.0363636
8780650	2	104	0.961538	0.0384615
8780810	2	112	0.964286	0.0357143
8781727	2	112	0.964286	0.0357143
8782097	2	112	0.964286	0.0357143
8782286	2	110	0.818182	0.181818
8782790	2	112	0.964286	0.0357143
8783738	2	110	0.854545	0.145455
8783857	2	108	0.824074	0.175926
8784364	2	112	0.964286	0.0357143
8785804	2	110	0.818182	0.181818
8785826	2	112	0.964286	0.0357143
8786039	2	108	0.814815	0.185185
8786185	2	110	0.981818	0.0181818
8786498	2	104	0.865385	0.134615
8786522	2	112	0.821429	0.178571
8786759	2	110	0.872727	0.127273
8789032	2	112	0.866071	0.133929
8789684	2	112	0.964286	0.0357143
8789795	2	112	0.8125	0.1875
8790053	2	110	0.963636	0.0363636
8791420	2	110	0.827273	0.172727
8791618	2	110	0.827273	0.172727
8791743	2	112	0.991071	0.00892857
8791787	2	112	0.964286	0.0357143
8792012	2	112	0.8125	0.1875
8793272	2	110	0.809091	0.190909
8793504	2	112	0.8125	0.1875
8793803	2	112	0.8125	0.1875
8794133	2	112	0.991071	0.00892857
8794678	2	112	0.964286	0.0357143
8794755	2	112	0.8125	0.1875
8795027	2	110	0.818182	0.181818
8795245	2	110	0.854545	0.145455
8795329	2	112	0.857143	0.142857
8795468	2	112	0.8125	0.1875
8795551	2	110	0.963636	0.0363636
8795614	2	112	0.857143	0.142857
8795761	2	112	0.964286	0.0357143
8795805	2	110	0.818182	0.181818
8796146	2	110	0.872727	0.127273
8796312	2	112	0.8125	0.1875
8796753	2	110	0.990909	0.00909091
8796857	2	110	0.963636	0.0363636
8797070	2	110	0.963636	0.0363636
8797808	2	112	0.8125	0.1875
8797847	2	110	0.809091	0.190909
8797892	2	112	0.964286	0.0357143
8798267	2	112	0.482143	0.517857
8798951	2	112	0.991071	0.00892857
8799327	2	110	0.827273	0.172727
8799405	2	108	0.962963	0.037037
8799421	2	112	0.991071	0.00892857
8799570	2	110	0.990909	0.00909091
8799709	2	112	0.0446429	0.955357
8799868	2	112	0.8125	0.1875
8800229	2	112	0.991071	0.00892857
8800573	2	112	0.8125	0.1875
8800693	2	112	0.991071	0.00892857
8800719	2	108	0.824074	0.175926
8800805	2	108	0.824074	0.175926
8801173	2	110	0.990909	0.00909091
8801440	2	108	0.824074	0.175926
8801659	2	112	0.8125	0.1875
8801691	2	110	0.872727	0.127273
8801873	2	110	0.827273	0.172727
8802237	2	112	0.8125	0.1875
8802604	2	112	0.991071	0.00892857
8802820	2	112	0.8125	0.1875
8803053	2	112	0.8125	0.1875
8803083	2	110	0.827273	0.172727
8803290	2	110	0.827273	0.172727
8803314	2	112	0.991071	0.00892857
8803874	2	112	0.964286	0.0357143
8804063	2	108	0.953704	0.0462963
8804260	2	110	0.990909	0.00909091
8804534	2	112	0.955357	0.0446429
8804571	2	112	0.8125	0.1875
8804737	2	110	0.809091	0.190909
8804748	2	106	0.801887	0.198113
8805009	2	98	0.969388	0.0306122
8805294	2	100	0.99	0.01
8805359	2	112	0.821429	0.178571
8805616	2	106	0.962264	0.0377358
8805822	2	100	0.87	0.13
8805912	2	92	0.717391	0.282609
8806633	2	40	0.975	0.025
8806781	2	102	0.735294	0.264706
8806847	2	108	0.694444	0.305556
8807138	2	104	0.923077	0.0769231
8807203	2	108	0.657407	0.342593
8807227	2	112	0.830357	0.169643
8807412	2	110	0.872727	0.127273
8807636	2	112	0.830357	0.169643
8807882	2	108	0.925926	0.0740741
8807994	2	108	0.925926	0.0740741
8808769	2	112	0.6875	0.3125
8808982	2	110	0.681818	0.318182
8809028	2	112	0.6875	0.3125
8809172	2	112	0.928571	0.0714286
8809441	2	112	0.973214	0.0267857
8809541	2	112	0.955357	0.0446429
8809543	2	110	0.927273	0.0727273
8809621	2	108	0.907407	0.0925926
8809777	2	110	0.354545	0.645455
8809800	2	110	0.927273	0.0727273
8810801	2	112	0.6875	0.3125
8810806	2	110	0.7	0.3
8811706	2	110	0.927273	0.0727273
8811760	2	112	0.901786	0.0982143
8812130	2	112	0.901786	0.0982143
8812317	2	112	0.857143	0.142857
8813545	2	110	0.872727	0.127273
8816169	2	110	0.7	0.3
8817760	2	112	0.0446429	0.955357
8817815	2	112	0.991071	0.00892857
8817862	2	112	0.928571	0.0714286
8817933	2	110	0.854545	0.145455
8823107	2	112	0.857143	0.142857
8823209	2	112	0.928571	0.0714286
8823453	2	112	0.973214	0.0267857
8824009	2	112	0.901786	0.0982143
8824010	2	112	0.901786	0.0982143
8824047	2	112	0.973214	0.0267857
8827585	2	108	0.898148	0.101852
8828382	2	112	0.901786	0.0982143
8829992	2	110	0.7	0.3
8832291	2	112	0.857143	0.142857
8832707	2	112	0.991071	0.00892857
8837310	2	112	0.901786	0.0982143
8838791	2	112	0.928571	0.0714286
8838952	2	108	0.925926	0.0740741
8841009	2	110	0.927273	0.0727273
8841849	2	110	0.954545	0.0454545
8841871	2	110	0.909091	0.0909091
8842361	2	112	0.928571	0.0714286
8842671	2	112	0.955357	0.0446429
8844616	2	110	0.927273	0.0727273
8845523	2	112	0.928571	0.0714286
8846069	2	108	0.768519	0.231481
8846540	2	112	0.991071	0.00892857
8847076	2	92	0.967391	0.0326087
8847168	2	110	0.7	0.3
8848434	2	112	0.6875	0.3125
8851790	2	110	0.927273	0.0727273
8851843	2	54	0.962963	0.037037
8855893	2	110	0.7	0.3
8855897	2	112	0.866071	0.133929
8855901	2	112	0.955357	0.0446429
8856793	2	112	0.901786	0.0982143
8857344	2	110	0.872727	0.127273
8857385	2	112	0.696429	0.303571
8857654	2	112	0.866071	0.133929
8857752	2	112	0.866071	0.133929
8858456	2	112	0.866071	0.133929
8859213	2	108	0.953704	0.0462963
8861667	2	104	0.951923	0.0480769
8863730	2	112	0.901786	0.0982143
8864383	2	110	0.918182	0.0818182
8864587	2	108	0.972222	0.0277778
8864994	2	112	0.0446429	0.955357
8865888	2	112	0.928571	0.0714286
8866392	2	106	0.981132	0.0188679
8866748	2	108	0.953704	0.0462963
8869144	2	108	0.694444	0.305556
8869267	2	110	0.954545	0.0454545
8869299	2	112	0.973214	0.0267857
8869417	2	112	0.6875	0.3125
8869418	2	112	0.928571	0.0714286
8869420	2	112	0.892857	0.107143
8870116	2	100	0.87	0.13
8871890	2	106	0.867925	0.132075
8872355	2	112	0.8125	0.1875
8873177	2	112	0.8125	0.1875
8873363	2	112	0.8125	0.1875
8875353	2	108	0.87037	0.12963
8875488	2	102	0.843137	0.156863
8876144	2	104	0.961538	0.0384615
8876524	2	110	0.654545	0.345455
8878391	2	110	0.954545	0.0454545
8879610	2	110	0.1	0.9
8879693	2	112	0.892857	0.107143
8879726	2	110	0.754545	0.245455
8882010	2	112	0.0714286	0.928571
8885821	2	112	0.955357	0.0446429
8886511	2	110	0.990909	0.00909091
8886587	2	106	0.886792	0.113208
8886699	2	106	0.943396	0.0566038
8886771	2	110	0.118182	0.881818
8886798	2	28	0.785714	0.214286
8886954	2	112	0.107143	0.892857
8887306	2	110	0.236364	0.763636
8887900	2	42	0.97619	0.0238095
8887948	2	110	0.809091	0.190909
8887999	2	112	0.794643	0.205357
8888043	2	110	0.745455	0.254545
8888242	2	108	0.101852	0.898148
8888275	2	110	0.954545	0.0454545
8888383	2	108	0.953704	0.0462963
8888694	2	106	0.0849057	0.915094
8889749	2	58	0.0172414	0.982759
8892780	2	56	0.0178571	0.982143
8894493	2	110	0.909091	0.0909091
8895048	2	112	0.0982143	0.901786
8895211	2	110	0.854545	0.145455
8895480	2	108	0.194444	0.805556
8895493	2	110	0.990909	0.00909091
8896418	2	22	0.863636	0.136364
8896499	2	30	0.866667	0.133333
8897066	2	110	0.163636	0.836364
8899822	2	112	0.848214	0.151786
8900123	2	104	0.836538	0.163462
8900142	2	112	0.848214	0.151786
8900334	2	112	0.848214	0.151786
8900836	2	112	0.848214	0.151786
8900844	2	110	0.845455	0.154545
8900874	2	110	0.845455	0.154545
8901078	2	108	0.398148	0.601852
8901086	2	112	0.848214	0.151786
8901536	2	102	0.862745	0.137255
8901539	2	108	0.861111	0.138889
8901872	2	112	0.848214	0.151786
8902031	2	112	0.848214	0.151786
8902329	2	112	0.848214	0.151786
8903076	2	108	0.851852	0.148148
8903091	2	88	0.852273	0.147727
8903866	2	112	0.848214	0.151786
8903983	2	112	0.848214	0.151786
8904091	2	108	0.953704	0.0462963
8904435	2	112	0.857143	0.142857
8906220	2	110	0.863636	0.136364
8907002	2	110	0.854545	0.145455
8909029	2	112	0.857143	0.142857
8909108	2	110	0.854545	0.145455
8909234	2	110	0.854545	0.145455
8909260	2	112	0.857143	0.142857
8909298	2	112	0.857143	0.142857
8909322	2	106	0.867925	0.132075
8909555	2	112	0.857143	0.142857
8909654	2	112	0.857143	0.142857
8909733	2	112	0.857143	0.142857
8909911	2	112	0.857143	0.142857
8911463	2	112	0.857143	0.142857
8911675	2	112	0.857143	0.142857
8913076	2	112	0.857143	0.142857
8916692	2	112	0.857143	0.142857
8917707	2	110	0.163636	0.836364
8918989	2	110	0.863636	0.136364
8919194	2	110	0.990909	0.00909091
8919340	2	112	0.00892857	0.991071
8920034	2	112	0.991071	0.00892857
8920104	2	112	0.892857	0.107143
8920154	2	110	0.790909	0.209091
8920441	2	42	0.952381	0.047619
8920515	2	112	0.892857	0.107143
8920604	2	112	0.00892857	0.991071
8920611	2	112	0.00892857	0.991071
8920804	2	112	0.00892857	0.991071
8920829	2	108	0.00925926	0.990741
8921417	2	112	0.00892857	0.991071
8921613	2	112	0.00892857	0.991071
8921688	2	112	0.00892857	0.991071
8921692	2	112	0.00892857	0.991071
8923331	2	112	0.00892857	0.991071
8932369	2	112	0.00892857	0.991071
8936363	2	112	0.00892857	0.991071
8940659	2	112	0.00892857	0.991071
8962997	2	106	0.990566	0.00943396
8984904	2	108	0.00925926	0.990741
8993261	2	110	0.00909091	0.990909
8994712	2	112	0.991071	0.00892857
9007904	2	112	0.00892857	0.991071
9008109	2	112	0.00892857	0.991071
9009114	2	110	0.00909091	0.990909
9010431	2	112	0.00892857	0.991071
9011664	2	112	0.991071	0.00892857
9011793	2	112	0.00892857	0.991071
9012277	2	112	0.991071	0.00892857
9014025	2	112	0.00892857	0.991071
9014895	2	112	0.00892857	0.991071
9015230	2	110	0.00909091	0.990909
9015832	2	112	0.00892857	0.991071
9016012	2	112	0.00892857	0.991071
9016103	2	108	0.00925926	0.990741
9016348	2	112	0.00892857	0.991071
9016361	2	110	0.00909091	0.990909
9016690	2	112	0.00892857	0.991071
9017202	2	110	0.00909091	0.990909
9017501	2	90	0.0111111	0.988889
9017717	2	112	0.00892857	0.991071
9018338	2	112	0.00892857	0.991071
9018546	2	112	0.991071	0.00892857
9018559	2	112	0.00892857	0.991071
9018764	2	110	0.00909091	0.990909
9018967	2	110	0.00909091	0.990909
9019122	2	112	0.00892857	0.991071
9019178	2	112	0.00892857	0.991071
9019733	2	112	0.00892857	0.991071
9019918	2	112	0.00892857	0.991071
9020921	2	112	0.00892857	0.991071
9021028	2	112	0.00892857	0.991071
9021643	2	110	0.00909091	0.990909
9022018	2	112	0.00892857	0.991071
9022094	2	112	0.00892857	0.991071
9022309	2	108	0.990741	0.00925926
9022766	2	106	0.990566	0.00943396
9023123	2	112	0.00892857	0.991071
9023396	2	34	0.647059	0.352941
9024467	2	112	0.00892857	0.991071
9024656	2	112	0.00892857	0.991071
9024712	2	112	0.991071	0.00892857
9024783	2	112	0.00892857	0.991071
9024896	2	112	0.00892857	0.991071
9026046	2	108	0.990741	0.00925926
9026067	2	112	0.991071	0.00892857
9026168	2	112	0.991071	0.00892857
9026515	2	104	0.00961538	0.990385
9026563	2	112	0.00892857	0.991071
9026768	2	112	0.991071	0.00892857
9027784	2	112	0.00892857	0.991071
9027816	2	102	0.00980392	0.990196
9028310	2	104	0.00961538	0.990385
9028677	2	112	0.00892857	0.991071
9029052	2	112	0.00892857	0.991071
9029721	2	112	0.00892857	0.991071
9030379	2	112	0.00892857	0.991071
9030921	2	110	0.00909091	0.990909
9030945	2	112	0.00892857	0.991071
9032611	2	112	0.991071	0.00892857
9032612	2	112	0.00892857	0.991071
9033958	2	112	0.00892857	0.991071
9034178	2	112	0.00892857	0.991071
9034270	2	112	0.00892857	0.991071
9034627	2	110	0.990909	0.00909091
9035208	2	112	0.991071	0.00892857
9035386	2	112	0.00892857	0.991071
9035573	2	112	0.991071	0.00892857
9036384	2	110	0.00909091	0.990909
9036389	2	106	0.00943396	0.990566
9036521	2	92	0.98913	0.0108696
9036677	2	110	0.990909	0.00909091
9036678	2	110	0.00909091	0.990909
9036801	2	108	0.00925926	0.990741
9037213	2	110	0.00909091	0.990909
9037627	2	112	0.991071	0.00892857
9037778	2	112	0.00892857	0.991071
9037865	2	112	0.00892857	0.991071
9039992	2	112	0.991071	0.00892857
9040421	2	112	0.00892857	0.991071
9040771	2	110	0.990909	0.00909091
9042752	2	110	0.00909091	0.990909
9042923	2	110	0.00909091	0.990909
9043172	2	112	0.00892857	0.991071
9043380	2	112	0.00892857	0.991071
9043841	2	112	0.991071	0.00892857
9044402	2	112	0.00892857	0.991071
9044545	2	112	0.00892857	0.991071
9045112	2	110	0.00909091	0.990909
9045818	2	112	0.866071	0.133929
9046181	2	110	0.00909091	0.990909
9046717	2	78	0.025641	0.974359
9047033	2	42	0.97619	0.0238095
9048632	2	108	0.861111	0.138889
9048731	2	112	0.00892857	0.991071
9049438	2	112	0.00892857	0.991071
9049511	2	112	0.00892857	0.991071
9050327	2	112	0.00892857	0.991071
9051651	2	112	0.00892857	0.991071
9051802	2	110	0.00909091	0.990909
9051916	2	112	0.00892857	0.991071
9052590	2	112	0.00892857	0.991071
9053002	2	110	0.890909	0.109091
9053320	2	112	0.991071	0.00892857
9053753	2	112	0.991071	0.00892857
9053760	2	110	0.00909091	0.990909
9054175	2	112	0.00892857	0.991071
9055269	2	112	0.00892857	0.991071
9055516	2	112	0.00892857	0.991071
9055652	2	112	0.00892857	0.991071
9055823	2	112	0.00892857	0.991071
9056025	2	110	0.00909091	0.990909
9056234	2	112	0.00892857	0.991071
9056312	2	96	0.0104167	0.989583
9056537	2	42	0.333333	0.666667
9056746	2	112	0.607143	0.392857
9056812	2	108	0.611111	0.388889
9056989	2	92	0.206522	0.793478
9057099	2	84	0.0238095	0.97619
9057675	2	92	0.945652	0.0543478
9058221	2	98	0.357143	0.642857
9059235	2	102	0.735294	0.264706
9059289	2	98	0.581633	0.418367
9059358	2	108	0.981481	0.0185185
9060418	2	110	0.8	0.2
9062114	2	112	0.348214	0.651786
9062566	2	112	0.0178571	0.982143
9063233	2	112	0.803571	0.196429
9063566	2	112	0.803571	0.196429
9064423	2	110	0.818182	0.181818
9064543	2	112	0.803571	0.196429
9064562	2	110	0.8	0.2
9067399	2	110	0.8	0.2
9068331	2	112	0.214286	0.785714
9068854	2	110	0.8	0.2
9069097	2	104	0.951923	0.0480769
9069619	2	112	0.803571	0.196429
9069743	2	112	0.982143	0.0178571
9069803	2	112	0.803571	0.196429
9069829	2	110	0.8	0.2
9069914	2	112	0.803571	0.196429
9070011	2	112	0.803571	0.196429
9070312	2	100	0.8	0.2
9071199	2	112	0.803571	0.196429
9071492	2	112	0.803571	0.196429
9071518	2	112	0.848214	0.151786
9071798	2	112	0.392857	0.607143
9072059	2	112	0.0178571	0.982143
9072306	2	108	0.814815	0.185185
9072443	2	52	0.769231	0.230769
9073229	2	88	0.806818	0.193182
9073244	2	112	0.803571	0.196429
9073376	2	112	0.214286	0.785714
9073497	2	112	0.803571	0.196429
9074366	2	110	0.8	0.2
9074388	2	112	0.803571	0.196429
9074606	2	112	0.803571	0.196429
9074911	2	78	0.74359	0.25641
9075169	2	112	0.803571	0.196429
9075226	2	112	0.803571	0.196429
9075547	2	112	0.803571	0.196429
9076032	2	110	0.218182	0.781818
9076737	2	112	0.803571	0.196429
9076824	2	112	0.982143	0.0178571
9077867	2	112	0.803571	0.196429
9078035	2	112	0.803571	0.196429
9078289	2	110	0.8	0.2
9078506	2	112	0.803571	0.196429
9079166	2	112	0.803571	0.196429
9079243	2	112	0.803571	0.196429
9079374	2	108	0.796296	0.203704
9079417	2	108	0.814815	0.185185
9080381	2	104	0.413462	0.586538
9080699	2	108	0.824074	0.175926
9080774	2	108	0.796296	0.203704
9081333	2	112	0.803571	0.196429
9081554	2	112	0.803571	0.196429
9082503	2	112	0.803571	0.196429
9082550	2	110	0.8	0.2
9082824	2	100	0.32	0.68
9083046	2	110	0.8	0.2
9084444	2	112	0.803571	0.196429
9084551	2	108	0.796296	0.203704
9084791	2	110	0.8	0.2
9085756	2	110	0.8	0.2
9086024	2	112	0.214286	0.785714
9087332	2	112	0.803571	0.196429
9087837	2	108	0.796296	0.203704
9087869	2	112	0.803571	0.196429
9089752	2	108	0.796296	0.203704
9089761	2	112	0.982143	0.0178571
9089840	2	112	0.803571	0.196429
9090725	2	112	0.214286	0.785714
9091425	2	108	0.805556	0.194444
9094099	2	112	0.803571	0.196429
9094335	2	110	0.8	0.2
9094392	2	108	0.824074	0.175926
9094549	2	108	0.805556	0.194444
9094633	2	112	0.803571	0.196429
9094735	2	112	0.803571	0.196429
9097204	2	112	0.803571	0.196429
9097994	2	112	0.0178571	0.982143
9098291	2	112	0.821429	0.178571
9098612	2	104	0.788462	0.211538
9098761	2	112	0.392857	0.607143
9099473	2	112	0.392857	0.607143
9099494	2	110	0.218182	0.781818
9099699	2	112	0.803571	0.196429
9099904	2	112	0.392857	0.607143
9100351	2	112	0.803571	0.196429
9100891	2	110	0.8	0.2
9101358	2	110	0.818182	0.181818
9101631	2	110	0.8	0.2
9102374	2	204	0.735294	0.264706
9102389	2	202	0.732673	0.267327
9102461	2	196	0.744898	0.255102
9104242	2	204	0.730392	0.269608
9104256	2	198	0.732323	0.267677
9104880	2	206	0.73301	0.26699
9105095	2	194	0.257732	0.742268
9105350	2	196	0.72449	0.27551
9105807	2	176	0.971591	0.0284091
9106097	2	204	0.735294	0.264706
9106205	2	190	0.989474	0.0105263
9106652	2	204	0.735294	0.264706
9107166	2	184	0.717391	0.282609
9107928	2	186	0.731183	0.268817
9108152	2	202	0.737624	0.262376
9108803	2	168	0.72619	0.27381
9109344	2	196	0.739796	0.260204
9110369	2	190	0.752632	0.247368
9110900	2	202	0.787129	0.212871
9110990	2	210	0.395238	0.604762
9111739	2	208	0.00961538	0.990385

## Sheet: Table S8
Table S8. Estimated genetic distances of dogs belonging to the 6 long-haired breeds selected using the pairwise comparison of the 200 kb RSPO2 3′ UTR insertion-linked region (CFA13:8,530,000–8,730,000 bp)
	YOT3	YOT8	CHC1	CHC2	YOT30	YOT58	PWD1	PWD2	PWD5	PWD9	YOT75	SAP1	SAP2	SAP3	SIT1	SIT3	SIT4	TIT1	TIT2
YOT8	9
CHC1	36	17.5
CHC2	35	16.5	3.5
YOT30	22.5	28.5	25	24
YOT58	16	23	17.5	16.5	23.5
PWD1	36	17	7.5	6.5	22	14
PWD2	36.5	17.5	8	7	23	15	5
PWD5	36.5	17.5	8	7	23	15	5	4.5
PWD9	35	17	8	7	22.5	14.5	5	5	5
YOT75	15.5	24.5	19.5	18.5	30	24.5	18.5	18.5	18.5	18
SAP1	37.5	26.5	28.5	27.5	30.5	26	30.5	30.5	30.5	29	28.5
SAP2	58.5	52.5	43.5	44	54.5	53.5	47	47	47	46.5	51.5	32.5
SAP3	35.5	26	29.5	28.5	31	26.5	31	31	31	29.5	26.5	3	32.5
SIT1	37	18.5	6.5	5.5	23.5	16	6	6	6	6	18.5	29	45.5	29.5
SIT3	37	18.5	6.5	5.5	23.5	16	6	6	6	6	18.5	29	45.5	29.5	3
SIT4	40	21.5	9.5	8.5	26.5	19	9	9	9	9	20.5	32	48.5	32.5	1	1
TIT1	35	16.5	4.5	3.5	21.5	14	4	4	4	4	17	27	43.5	27.5	2.5	2.5	5.5
TIT2	36	17.5	5.5	4.5	21.5	15	5	5	5	5	18	28	44.5	28.5	3.5	3.5	6.5	1.5
TIT5	35	16.5	4.5	3.5	21.5	14	4	4.5	4.5	4.5	17.5	27.5	44	28	3.5	3.5	6.5	1.5	2.5
Note: Sample and breed information is described in Table S1

## Sheet: Table S9
Table S9. Results of haplotype block estimation using the HaploView program
Block	Major Haplotypes (>1%)	Haplotype frequency	Case frequency	Control frequency	Chi Square	P-value
Block1	GGTGGCACAGC	0.692	0.991	0.594	61.223	5.0963e-15
	GACATTCTGGC	0.156	0	0.207	27.044	1.9883e-07
	AGTGGCACAAT	0.092	0.009	0.118	11.914	0.0006
	GACATCCCAGC	0.018	0	0.024	2.649	0.1036
	AGTGGCACAGC	0.011	0	0.015	1.688	0.1939
	GACGTCCCAGC	0.011	0	0.015	1.646	0.1996
Block 2	ATTC	0.797	1	0.731	37.164	1.0858e-09
	GGAT	0.164	0	0.218	28.67	8.5837e-08
	AGAT	0.039	0	0.051	5.885	0.0153
Block 3	CGAGG	0.781	1	0.71	40.834	1.6575e-10
	TTTAA	0.078	0	0.103	12.337	0.0004
	TTAAA	0.055	0	0.073	8.558	0.0034
	CGAGA	0.042	0	0.056	6.463	0.011
	TGAAA	0.032	0	0.042	4.769	0.029
Block 4	CG	0.94	1	0.92	9.351	0.0022
	TA	0.06	0	0.08	9.351	0.0022
Block 5	GGGGA	0.749	0.998	0.668	48.16	3.9277e-12
	AAGAT	0.083	0	0.109	13.125	0.0003
	GGAGA	0.068	0.002	0.089	10.092	0.0015
	GAGGT	0.067	0	0.089	10.464	0.0012
	GAGGA	0.031	0	0.041	4.703	0.0301
Block 6	CG	0.915	0.991	0.891	10.772	0.001
	AA	0.085	0.009	0.109	10.772	0.001
Block 7	AAA	0.786	0.991	0.719	36.461	1.5575e-09
	GCG	0.109	0.009	0.142	15.025	0.0001
	ACA	0.096	0	0.127	15.476	8.3543e-05
Block 8	TGAAACCCTT	0.627	0.991	0.509	82.474	1.0705e-19
	TGGAATTCCC	0.152	0	0.201	26.077	3.2803e-07
	ATATGCCGTC	0.089	0	0.118	14.294	0.0002
	TGAAACCGTC	0.087	0.009	0.112	11.151	0.0008
	TGATACCCTC	0.02	0	0.027	2.989	0.0838
Block 9	CTCGTGAAACGCGGGGACA	0.607	0.99	0.482	89.853	2.5652e-21
	CTCGTAAAACGCGGAGAAA	0.158	0	0.21	27.458	1.6053e-07
	ATTTTGTAAAGCAGGGGCT	0.105	0.009	0.136	14.255	0.0002
	ACCTGGAGGCATGAGAAAA	0.092	0	0.121	14.687	0.0001
	CTCGTGAAACGCGGGGAAA	0.016	0	0.021	2.197	0.1383
	CTCGTGAAGCATGGGAAAA	0.011	0	0.015	1.646	0.1996
Block 10	AG	0.83	1	0.775	29.787	4.8225e-08
	CT	0.17	0	0.225	29.787	4.8225e-08
Block 11	AA	0.924	1	0.899	11.974	0.0005
	GG	0.054	0	0.071	8.253	0.0041
	GA	0.022	0	0.03	3.329	0.0681
Block 12	CG	0.85	1	0.802	25.639	4.116e-07
	TA	0.145	0	0.192	24.744	6.5475e-07
Block 13	CCTTACC	0.737	0.991	0.654	48.598	3.1413e-12
	CTTTTTC	0.145	0	0.192	24.744	6.5475e-07
	ACCCACG	0.103	0.009	0.133	13.859	0.0002
	CTTTTCC	0.011	0	0.015	1.646	0.1996
Block 14	CGATGCTACATCCG	0.36	0.978	0.159	241.471	1.8788e-54
	CGATACTACATCCG	0.196	0	0.26	35.64	2.374e-09
	CAACGTTGCCTCCG	0.17	0	0.225	29.787	4.8225e-08
	TGGTGCCACACATT	0.145	0	0.192	24.691	6.7306e-07
	CGATGCTATATCCG	0.113	0.022	0.143	12.031	0.0005
Block 15	GTGGACCCCTCGCGA	0.56	0.991	0.42	109.749	1.1121e-25
	ATGGACCCCTCACTG	0.15	0	0.198	25.639	4.116e-07
	GTAAGCTCTACGCGA	0.109	0.009	0.142	15.052	0.0001
	GCGGATCTCTTGCGA	0.094	0	0.124	15.083	0.0001
	GTGGATCCCTTGTGA	0.083	0	0.109	13.125	0.0003
Block 16	TT	0.89	0.991	0.857	15.163	9.8639e-05
	CC	0.11	0.009	0.143	15.163	9.8639e-05
Block 17	CTCCGAACCCGAAAGCCG	0.45	0.994	0.273	174.098	9.4209e-40
	CTCCGAACCCGAAGGACG	0.194	0.005	0.255	33.121	8.6583e-09
	CTCCGACCCCAACAACCG	0.118	0	0.157	19.563	9.7342e-06
	AACTATACCCGAAAGCCG	0.08	0	0.106	12.68	0.0004
	AACTATATCTGTAAGCAA	0.063	0	0.083	9.72	0.0018
	CTTCGAACACGAAAGCCG	0.061	0	0.08	9.396	0.0022
Block 18	GC	0.912	1	0.884	14.001	0.0002
	AT	0.075	0	0.1	11.845	0.0006
Block 19	AA	0.949	1	0.932	7.89	0.005
	GC	0.051	0	0.068	7.89	0.005
Block 20	TGTAGTTAAGAAGCTTGCAAAGTGAGGGAATGTCTACGTGTGGAAACTCACTGCATC	0.298	0	0.396	62.126	3.2219e-15
	TGTAGTTAAGAAGCTTGCAAAGTGAGGGAATGTCTACGTATGGAAACTCGCTGCATC	0.266	0.999	0.028	399.485	7.1277e-89
	TGTAGTTAAGAAGCTTGCAAAATGAGGGAATGTTCAAGCACCTATACTTGAGGTAGC	0.073	0	0.097	11.563	0.0007
	CGTGGTTAAAAAGCTTGCAAAGTGAGGAGATGCCTACATACCGGAACTCGCTGCGTT	0.069	0	0.091	10.768	0.001
	TACACACGCGGGATCCATCAGACGGACGAGCATCTGCATACCGAAGTCCGCTACGTC	0.058	0	0.077	9.004	0.0027
	TGTAGTTAAGAAGCTTGCAGAGTAAGGGAATGTCTACGTATGGAAACTCGCTGCATC	0.028	0	0.037	4.232	0.0397
	TGTAGTTAAGAAGCTTGCAAAATGAGGGAATGTTCAAGCACCTAAACTTGAGGTAGC	0.025	0	0.033	3.678	0.0551
	TGTAGTTAAGAAGCTTGCAAAGTGAGGGAATGTCTACGTACCGGAACTCGCTGCATC	0.02	0	0.027	2.996	0.0835
	TGTAGTTAAGAAGCTTGCAGAGTAAGGGAATGTCTACGTATGGAAACTCACTGCATC	0.019	0	0.025	2.766	0.0963
	TGTAGTTAAGAAGCTTGCAAAGTGAGGAGATGCCTACATACCGGAACTCGCTGCGTT	0.016	0	0.021	2.378	0.1231
	TGTAGTTAAGAAGCTTGCAAAATGAGGGAATGTTCAAGCACCTAAACTTACTGCAGC	0.012	0	0.017	1.846	0.1742
	TGTAGTTAAGAAGCTTGCAAAATGAGGGAATGTTCAAGCACCTATACTTGCGGTAGC	0.011	0	0.014	1.575	0.2094
Block 21	GAA	0.935	1	0.913	10.154	0.0014
	ATG	0.06	0	0.08	9.351	0.0022
Block 22	CG	0.94	1	0.92	9.351	0.0022
	AA	0.06	0	0.08	9.351	0.0022
Block 23	GC	0.819	1	0.76	32.179	1.406e-08
	TG	0.121	0	0.16	19.983	7.8151e-06
	TC	0.06	0	0.08	9.351	0.0022
Block 24	TGCTCGGCGTAGCG	0.718	0.999	0.626	56.794	4.8397e-14
	CAGCCCGCTCGACA	0.104	0	0.138	17.003	3.732e-05
	TGCTGGGCGTAGCG	0.057	0.001	0.075	8.344	0.0039
	TGCTCGATGTAGAG	0.056	0	0.074	8.617	0.0033
	CAGCCGGCTCGACG	0.018	0	0.024	2.651	0.1035
	TGCTCGGCTTGGCG	0.014	0	0.018	1.998	0.1575
Block 25	CAGGAATT	0.714	1	0.622	58.264	2.2925e-14
	CAGGAGTT	0.178	0	0.236	31.615	1.8795e-08
	TGCAGAGC	0.045	0	0.059	6.818	0.009
	CAGAAATT	0.029	0	0.039	4.384	0.0363
	TGGAGATC	0.012	0	0.016	1.756	0.1852
Block 26	AA	0.946	1	0.929	8.254	0.0041
	GG	0.051	0	0.068	7.89	0.005
Block 27	ACC	0.888	1	0.852	18.316	1.8709e-05
	GTA	0.112	0	0.148	18.316	1.8709e-05
Block 28	GGCCCGTT	0.794	0.845	0.777	2.348	0.1254
	GGCTAACG	0.103	0.153	0.086	4.028	0.0448
	TAATAACG	0.082	0	0.109	13.039	0.0003
Block 29	TA	0.703	0.953	0.621	43.836	3.5714e-11
	GT	0.276	0.045	0.351	38.849	4.578e-10
	GA	0.014	0.001	0.018	1.857	0.173
Note: A total of 29 haplotype blocks were determined for the 200 kb region associated to RSPO2 3' UTR. Block names and their tagging SNPs were shown together with haplotype frequency, case (the RSPO2 3’UTR insertion homozygote) and control (the wildtype homozygote) frequencies, and chi square statistics.

## Sheet: Table S10
Table S10. Prediction of RSPO2 3′ UTR insertion genotypes according to the haplotypes of the RSPO2 3' UTR-linked region for the individuals lacking RSPO2 sequences
Breed abbreviation with animal number	Haplotype 1	Haplotype 2	Genotype(RSPO2 3' UTR)
ACD1	Hap6	Hap17	11
ACD2	Hap7	Hap8	11
ACD3	Hap8	Hap6	11
ACD4	Hap6	Hap6	11
AHT1	Hap7	Hap22	11
ALD1	Hap10	Hap31	11
BAH1	Hap7	Hap14	11
BEA1	Hap10	Hap7	11
BEA2	Hap7	Hap69	11
BEA3	Hap7	Hap10	11
BEM4	Hap8	Hap47	11
BEM5	Hap13	Hap8	11
BEP1	Hap1	Hap1	22
BEP2	Hap1	Hap1	22
BEP3	Hap1	Hap1	22
BEP4	Hap1	Hap1	22
BES1	Hap6	Hap6	11
BES3	Hap6	Hap7	11
BES6	Hap7	Hap6	11
BET1	Hap14	Hap14	11
BET10	Hap6	Hap8	11
BET4	Hap6	Hap6	11
BTC1	Hap8	Hap15	11
BTM1	Hap20	Hap20	11
BUL1	Hap20	Hap20	11
BUT1	Hap20	Hap22	11
BUT2	Hap7	Hap22	11
BUT3	Hap7	Hap7	11
BUT4	Hap22	Hap20	11
BUT5	Hap22	Hap22	11
BUT6	Hap22	Hap22	11
BUT7	Hap22	Hap22	11
CAC1	Hap23	Hap70	11
CAD1	Hap24	Hap17	11
CCR1	Hap7	Hap7	11
CHC1	Hap1	Hap1	22
CHC2	Hap1	Hap1	22
CKC1	Hap17	Hap30	11
CKC2	Hap17	Hap61	11
COC2	Hap10	Hap10	11
COY1	Hap26	Hap26	11
DAC1	Hap19	Hap10	11
DAC2	Hap10	Hap61	11
DAC4	Hap6	Hap1	12
DAL2	Hap12	Hap10	11
DON14	Hap27	Hap28	11
DON16	Hap28	Hap29	11
DON18	Hap29	Hap63	11
DON9	Hap12	Hap71	11
ELO1	Hap7	Hap14	11
ENM1	Hap22	Hap22	11
ENP1	Hap13	Hap7	11
ENS1	Hap7	Hap7	11
ENS2	Hap7	Hap7	11
ENS3	Hap7	Hap7	11
FIS1	Hap20	Hap20	11
FOD1	Hap1	Hap1	22
FRB2	Hap7	Hap7	11
GHT1	Hap1	Hap48	12
GRO1	Hap7	Hap13	11
GWP1	Hap7	Hap1	12
HEI1	Hap48	Hap1	12
HIW10	Hap50	Hap78	11
HIW11	Hap51	Hap51	11
HIW2	Hap51	Hap51	11
HIW3	Hap51	Hap74	11
HIW4	Hap52	Hap51	11
HIW5	Hap53	Hap79	11
HIW6	Hap46	Hap80	11
HIW7	Hap54	Hap55	11
HIW8	Hap55	Hap35	11
IBW1	Hap37	Hap37	11
IRS1	Hap25	Hap7	11
JAM1	Hap56	Hap69	11
JIN1	Hap10	Hap58	11
JIN2	Hap57	Hap29	11
JIN3	Hap58	Hap81	11
JIN4	Hap28	Hap63	11
JIN5	Hap29	Hap17	11
JIN6	Hap29	Hap17	11
JRT1	Hap48	Hap19	11
JRT2	Hap10	Hap7	11
JRT3	Hap1	Hap82	12
JRT4	Hap1	Hap10	12
KBT1	Hap1	Hap4	22
KEE1	Hap59	Hap83	11
KOM1	Hap1	Hap1	22
LAN1	Hap10	Hap84	11
LGR2	Hap1	Hap1	22
LOW1	Hap1	Hap1	22
NGS1	Hap24	Hap24	11
NOE1	Hap7	Hap17	11
NOE2	Hap17	Hap7	11
NOL1	Hap6	Hap6	11
NSD1	Hap60	Hap86	11
POP1	Hap1	Hap1	22
PWC2	Hap14	Hap7	11
PWC3	Hap7	Hap7	11
PWD1	Hap1	Hap1	22
PWD11	Hap1	Hap1	22
PWD2	Hap2	Hap1	22
PWD5	Hap1	Hap1	22
PWD7	Hap22	Hap1	12
PWD8	Hap1	Hap1	22
PWD9	Hap1	Hap1	22
REW1	Hap65	Hap89	11
RHR1	Hap22	Hap7	11
RHR4	Hap7	Hap7	11
RHR5	Hap66	Hap66	11
SHI1	Hap63	Hap63	11
SHI2	Hap17	Hap81	11
SHI3	Hap17	Hap17	11
SHI4	Hap48	Hap7	11
SHI5	Hap17	Hap91	11
SHI6	Hap17	Hap17	11
SHS1	Hap60	Hap17	11
SHS2	Hap67	Hap17	11
SHS3	Hap17	Hap17	11
SIH1	Hap59	Hap59	11
SIH2	Hap7	Hap22	11
SIH4	Hap59	Hap92	11
SLO1	Hap68	Hap8	11
SLO2	Hap68	Hap7	11
SLO3	Hap8	Hap68	11
SLO4	Hap68	Hap8	11
SPI1	Hap1	Hap1	22
TIM1	Hap17	Hap64	11
TIM2	Hap57	Hap17	11
TIM3	Hap17	Hap17	11
TIM4	Hap28	Hap93	11
TIM5	Hap17	Hap17	11
TIT1	Hap1	Hap1	22
TIT2	Hap1	Hap4	22
TIT5	Hap1	Hap1	22
TOP1	Hap1	Hap20	12
VDA1	Hap8	Hap57	11
VIZ1	Hap12	Hap48	11
WEI1	Hap7	Hap61	11

[truncated: 1 more sheets: Table S11]
